# Supplementary material for: Differential TGFβ pathway targeting by miR-122 in humans and mice affects liver cancer metastasis
Source: PubMed Central journal article supplement (PMC4802055; doi:10.1038/ncomms11012), 2016-03-18
Supplement: ncomms11012-s1.pdf [file ncomms11012-s1.pdf]

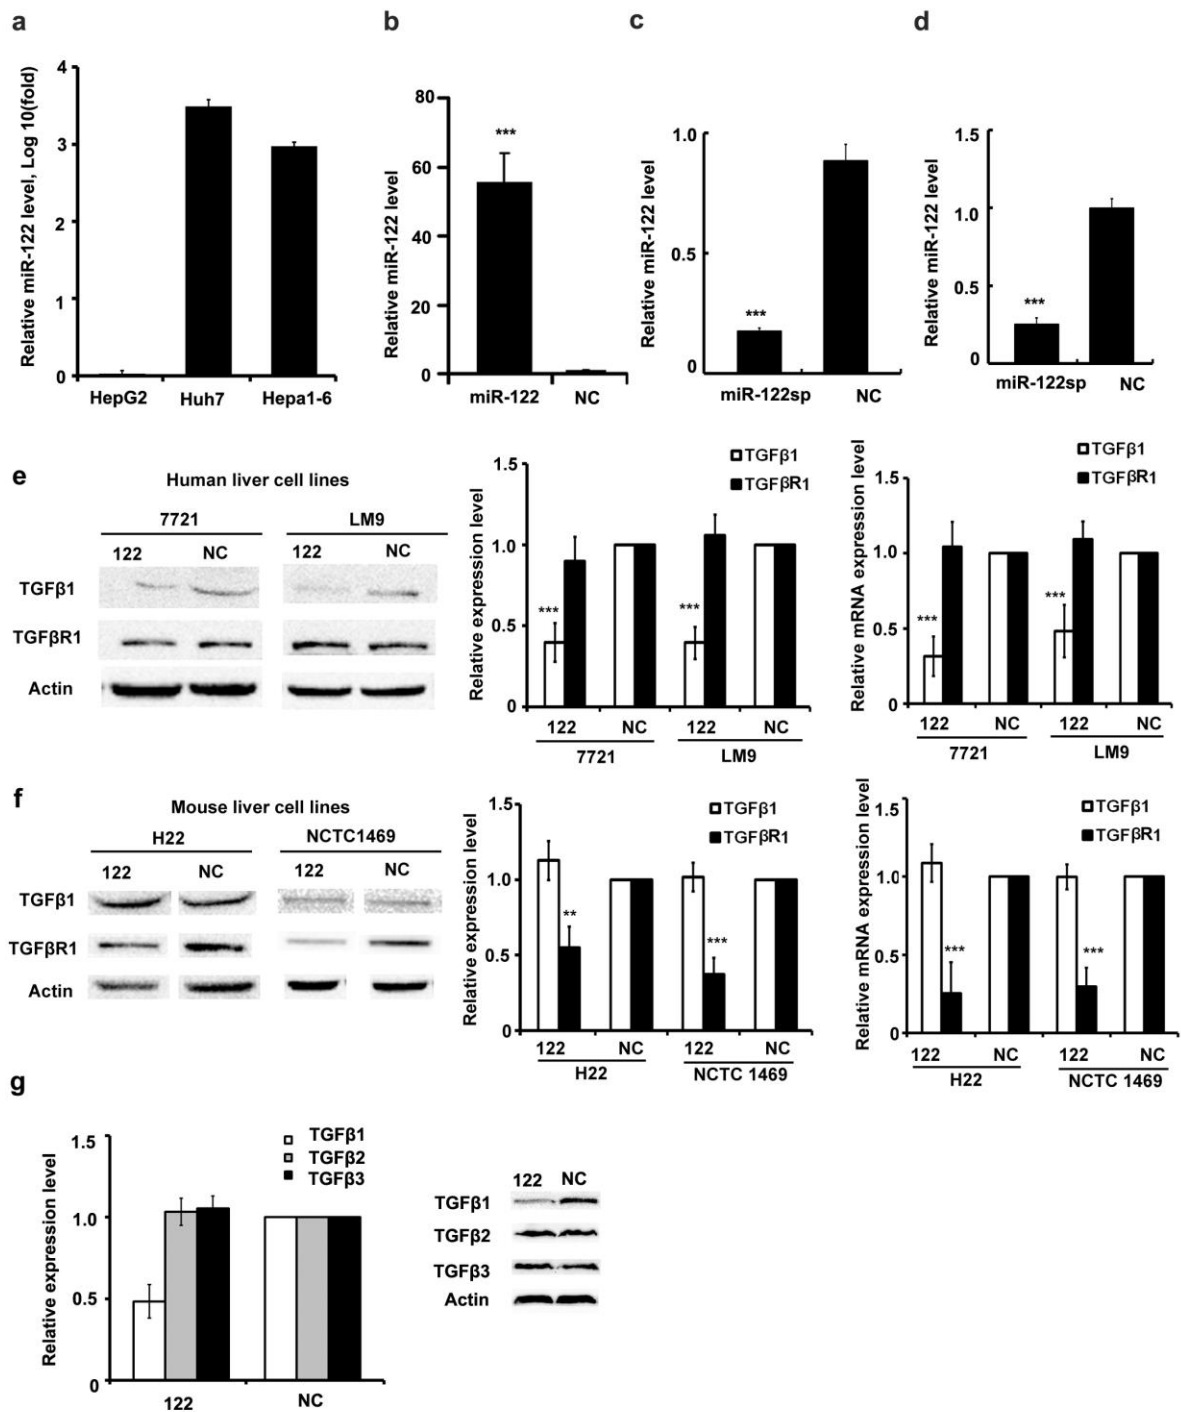

**Supplementary Figure S1.** Species-dependent targeting TGFβ1/TGFβR1 by miR-122

a. Expression of miR-122 in HepG2, Huh7 or Hepa1-6 cells. Three independent repeats are performed.

b. miR-122 level detected by the AGO-IP assay in transfected HepG2 cells. Three independent repeats are performed.

- c. Expression of miR-122 in Huh7 cells transfected with miR-122 sponge and NC. Three independent repeats are performed in each experiment.
- d. Expression of miR-122 in Hepa1-6 cells transfected with miR-122 sponge and NC. Three independent repeats are performed in each experiment.
- e. Expression level of TGF $\beta$ 1, TGF $\beta$ 2 or TGF $\beta$ 3 in HepG2-122 cells or HepG2 cells. Error bars,  $\pm$  s.d \*  $P < 0.05$ ; \*\*  $P < 0.01$ ; \*\*\*  $P < 0.001$  by two-sided Student's  $t$  test. NC: negative control.

**a**

TGFβ1 5'UTR conserved sequence

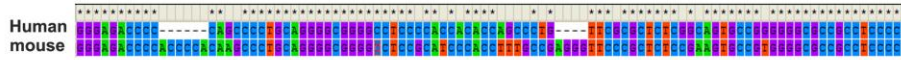

TGFβ1 3'UTR conserved sequence

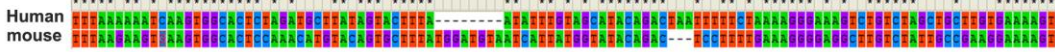

**b**

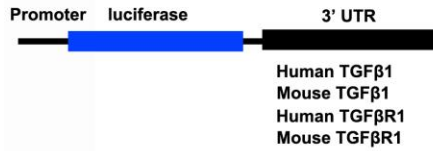

**c**

1. Gene annotation

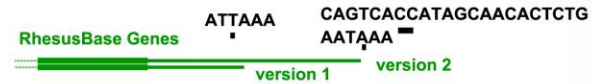

2. Rhesus ESTs Including Unspliced

3. Rhesus mRNAs from GenBank

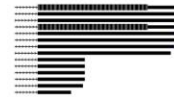

4. Poly (A)-tail sequencing

|  |                               |
|--|-------------------------------|
|  | Brain from Merk (Rev strand)  |
|  | Ileum from Merk (Rev strand)  |
|  | Kidney from Merk (Rev strand) |
|  | Liver from Merk (Rev strand)  |

**d**

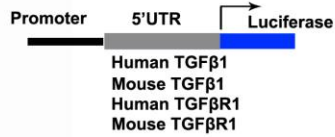

**e**

Fragment 4

CCCCGGTCCAAGCCTCCCCTCCACCACTGCGCCCTTCTCCCTGAGGACCTCAGCTTTCCTCGAGGCCCTCTACCTTTTGCCGGGAGA

CCCCAGCCCTGCAGGGGGGGGGCCTCCCCACCACACCGCCCTGTTCGCGCTCTCGGCAGTGCCGGGGGGGGCCGCTCCCC

Fragment 7 (underline)

Fragment 6 (red)

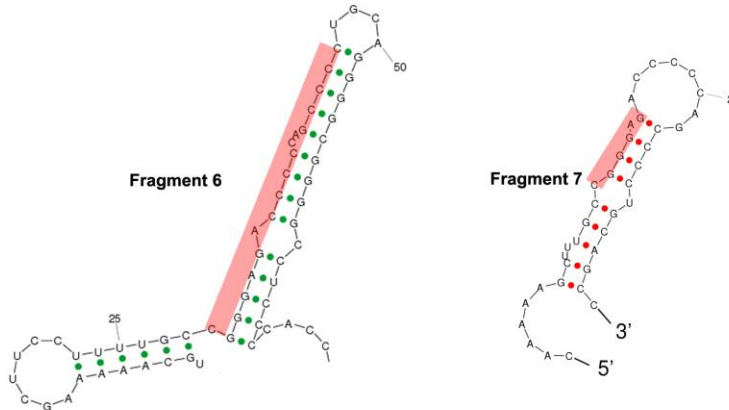

**f**

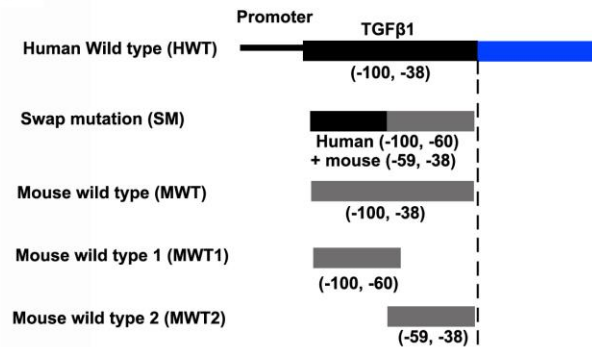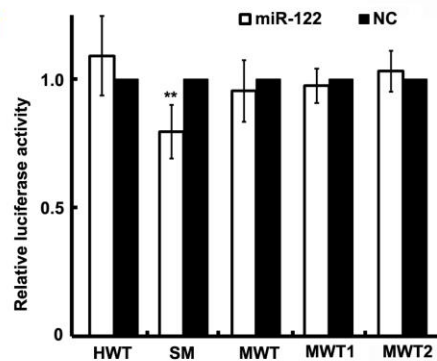

**Supplementary Figure S2.** The identification of the targeting site of miRNA-122 in TGF $\beta$ 1 5'UTR

- a. Comparative analysis of 5'UTR or 3'UTR conserved sequence in TGF $\beta$ 1 or TGF $\beta$ R1 in humans and mice.
- b. Diagram showing a luciferase reporter construct containing different 3'UTRs.
- c. Evidences showing the amount of different versions of Rhesus monkey TGF $\beta$ 1 mRNAs, which includes gene annotation from UCSC Genes and ESTs, GenBank (NCBI), or PolyA sequencing data of different tissues (Derti et al., 2012).
- d. Diagram showing a luciferase reporter construct containing different 5'UTRs.
- e. Sequences of fragment 4, 6 (highlighted in red) or 7 (highlighted in underline) and predicted secondary RNA structure of fragment 6 or 7, in which the sequence targeted by miR-122 was shadowed in red.
- f. Swap mutation experiments to identify the targeting region of miR-122 in human TGF $\beta$ 1 5'UTR. Six independent repeats are performed in each experiment.

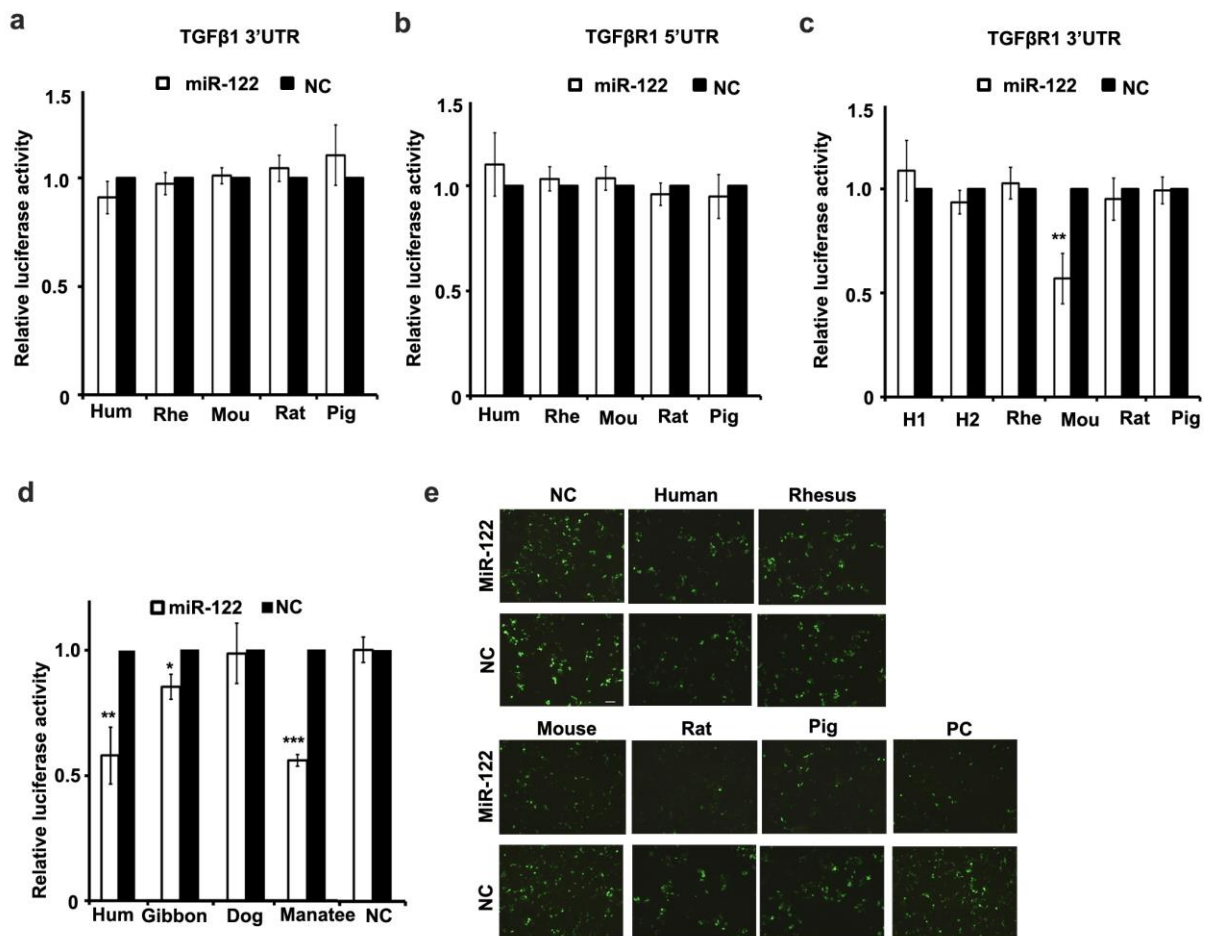

### Supplementary Figure S3. Molecular mechanism of switch of miR-122 targeting of TGFβ1/ TGFβR1 across vertebrate species

a. Luciferase activity was measured after transfection of the indicated reporter constructs. TGFβ1 3'UTRs were cloned into 3'UTR of luciferase in a pGL plasmid, respectively. Hum: Human, Rhe: Rhesus monkey; Mou: Mouse. Six independent repeats are performed in each experiment.

b. Luciferase activity was measured after transfection of the indicated reporter constructs. TGFβR1 5'UTR was cloned into the promoter region. Hum: Human, Rhe: Rhesus monkey; Mou: Mouse. Six independent repeats are performed in each experiment.

c. Luciferase activity was measured after transfection of the indicated reporter constructs. TGFβR1 3'UTR was cloned into 3'UTR of luciferase in pGL plasmid. The 3'UTR of human TGFβ1 was divided into two parts, H1 or H2, because of its long

length. Six independent repeats are performed in each experiment.

d. Luciferase activity was measured after transfection of the indicated reporter constructs. The target sequence of TGF $\beta$ 1 5'UTR in different species was cloned into the promoter region of pGL plasmid. Six independent repeats are performed in each experiment.

e. Fluorescent images showing Hela cells transfected with miR-122 as well as the indicated reporter constructs. All the candidate sequences were cloned in the CDS of a fusion protein of luciferase and eGFP. The construct of a reporter was shown in Figure 3C. Six independent repeats are performed in each experiment.

Error bars,  $\pm$  SD \*  $P < 0.05$ ; \*\*  $P < 0.01$ ; \*\*\*  $P < 0.001$  by two-sided Student's  $t$  test. NC: Negative control.

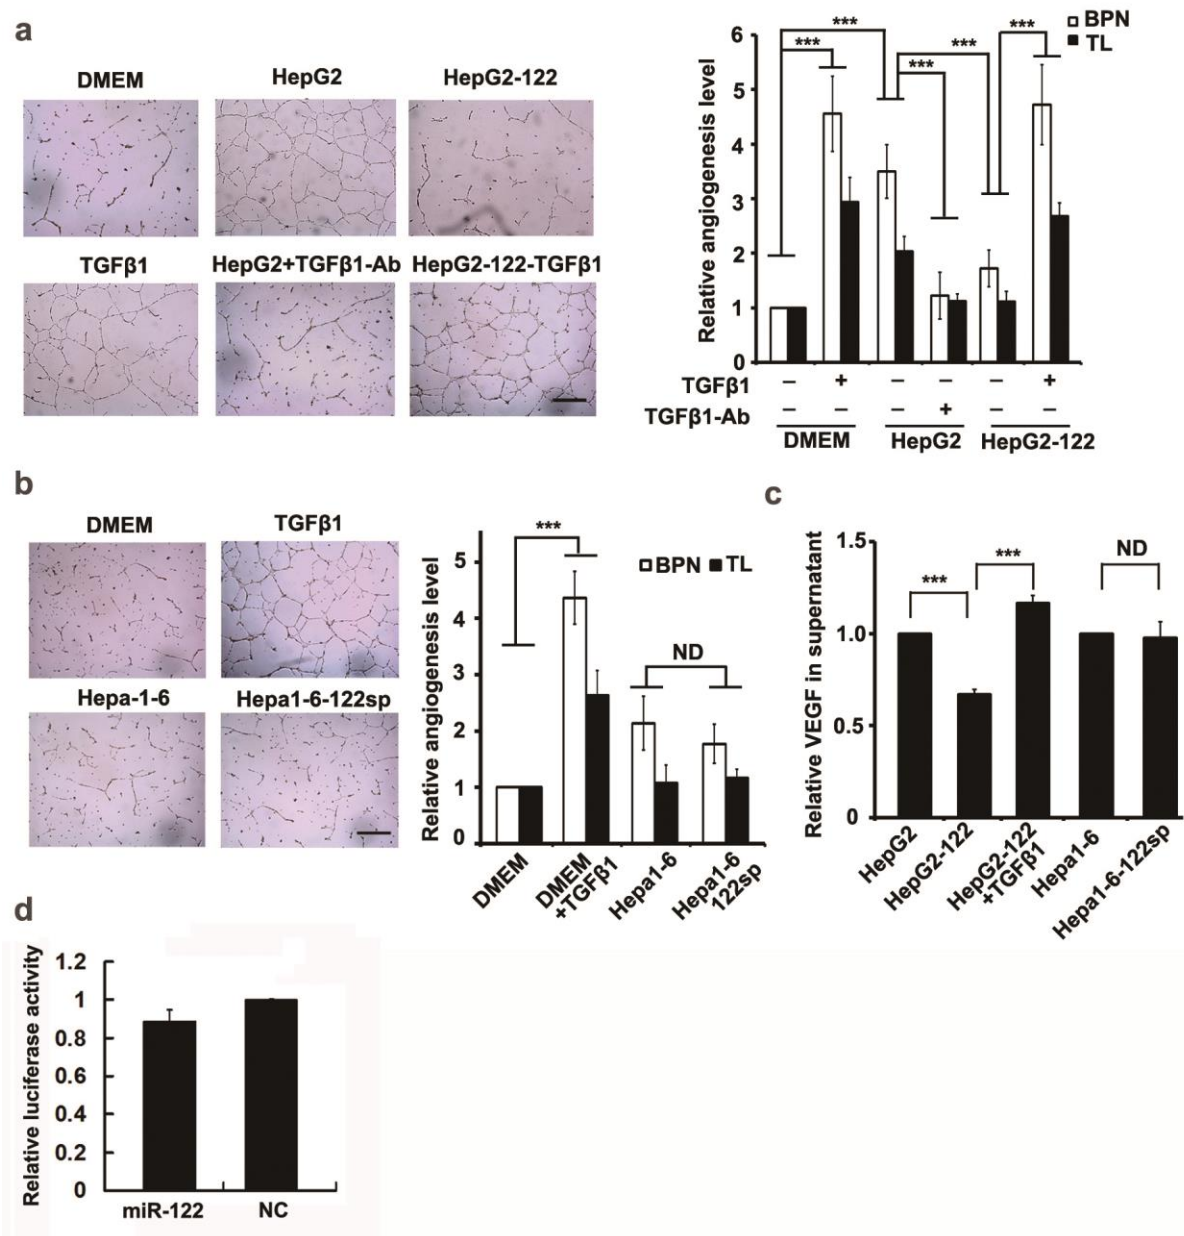

**Supplementary Figure S4.** MiR-122 has a distinct impact on angiogenesis in human or mouse cells

a, b Repressive images showing endothelial cells that were treated as indicated in 24 hours after planting. Quantitation analysis of the tubule branch point number (BPN) and tubule length (TL) is shown in right, respectively. Scale bar: 500  $\mu$ m. Three independent repeats are performed in each experiment.

c. Expression level of VEGF in HepG2 or Hepa1-6 cells, treated as indicated, was quantified by ELISA assay. Three independent repeats are performed in each experiment.

d. Luciferase assay shows that miR-122 does not directly target VEGF. Six independent repeats are performed in each experiment.

Error bars,  $\pm$  SD \*  $P < 0.05$ ; \*\*  $P < 0.01$ ; \*\*\*  $P < 0.001$  by two-sided Student's  $t$  test. ND: No difference.



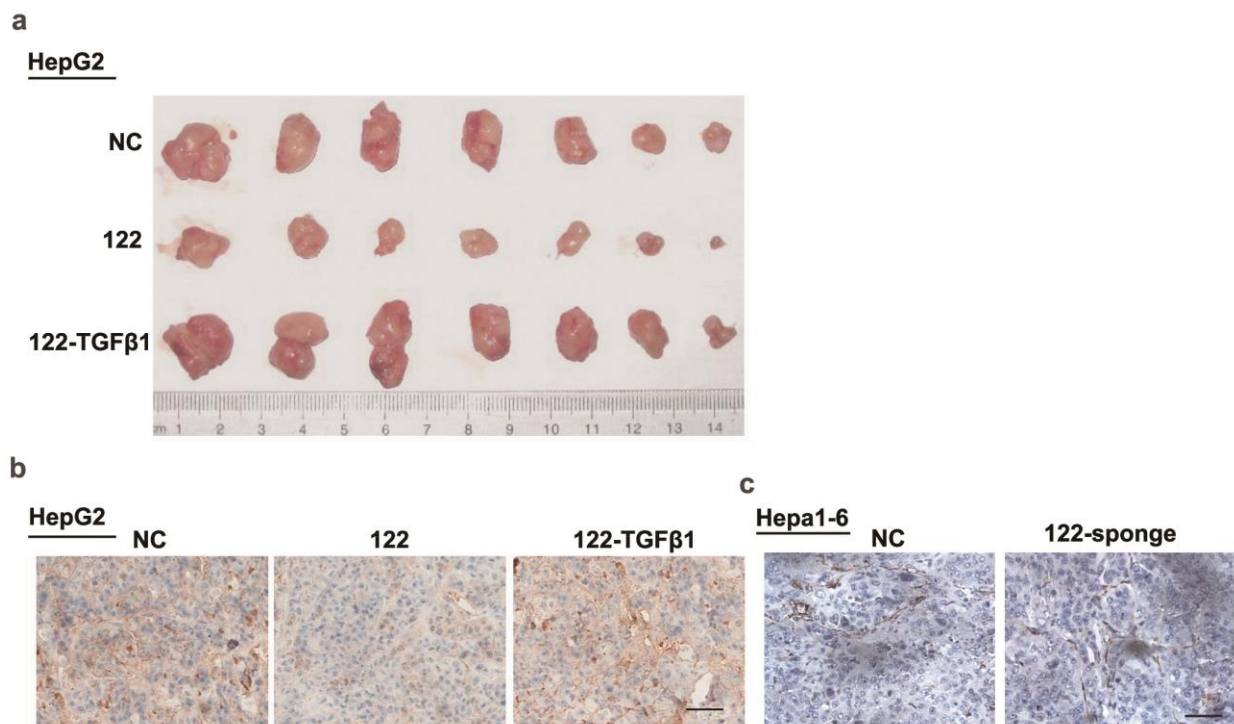

**Supplementary Figure S5.** Loss of miR-122 caused the different metastatic effects in human xenografts or mouse allografts

a. Images showing tumor size in mice implanted with the indicated cells. Seven independent repeats are performed in each experiment.

b, c. CD31 stained sections of liver cancer tissues as indicated. Seven independent repeats are performed in each experiment. Scale bar: 50 μm.

Error bars,  $\pm$  s.d \*  $P < 0.05$ ; \*\*  $P < 0.01$ ; \*\*\*  $P < 0.001$  by two-sided Student's *t* test.

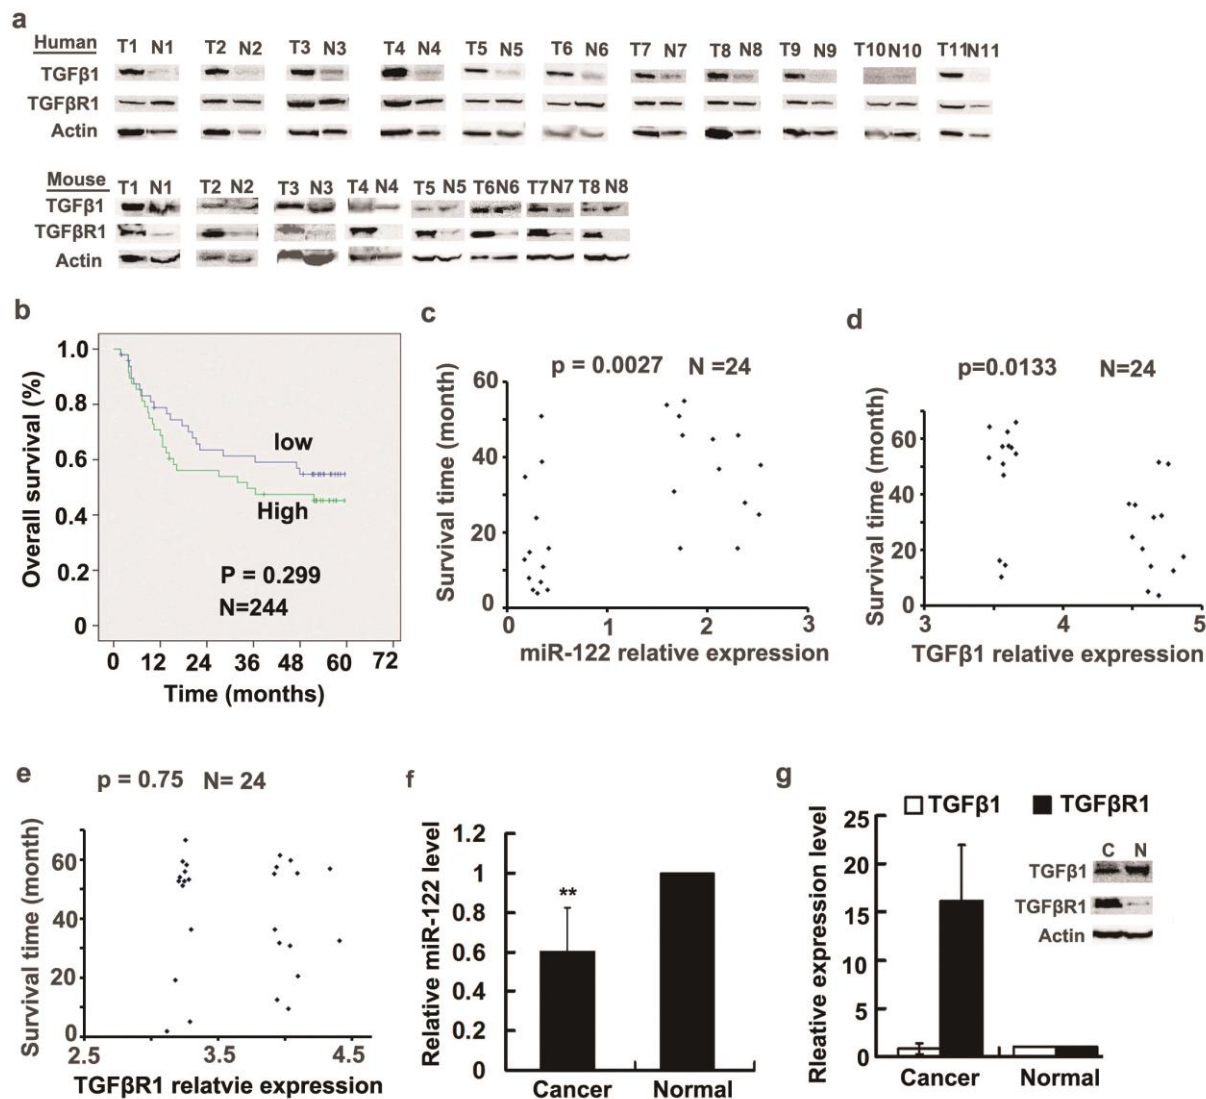

**Supplementary Figure S6. Loss of miR-122 caused the different metastatic effects in human or mouse hepatocellular carcinoma samples**

a. Western blot analysis of TGFβ1 or TGFβR1 in human or mouse liver cancer samples as well as normal adjacent samples. 11 pairs of human tissue samples and 8 pairs of mouse tissue samples were studied. Actin as loading control.

b. Kaplan–Meier curves for overall survival in HCC cohort from the Liver Cancer Institute (LCI) and Zhongshan Hospital. Expression value=log<sub>2</sub> of RMA-calculated Signal Intensity. TGFβR1 expression value <4 as low expression group, while TGFβR1 expression value >5 as high expression group. n=244 patients; P-value based on the Mantel–Cox log-rank test.

c. Representative data of miR-122 expression were shown. N=24 patients.

d-e. Representative data of TGF- $\beta$ 1 or TGF- $\beta$ R1 expression were shown in 24 patients.

f. Quantitative analysis of miR-122 levels in hepatocellular tumors in tissues as indicated (eight independent repeats).

g. Western blot assay showing the expression levels of TGF $\beta$ 1/TGF $\beta$ R1 in tissues as indicated. Representative images are shown in the inset. Eight independent repeats are performed in each experiment. C: cancer; N: normal. T $\beta$ :TGF $\beta$ 1; T $\beta$ R: TGF $\beta$ R1.

Error bars,  $\pm$  s.d \*  $P < 0.05$ ; \*\*  $P < 0.01$ ; \*\*\*  $P < 0.001$  by two-sided Student's *t* test.

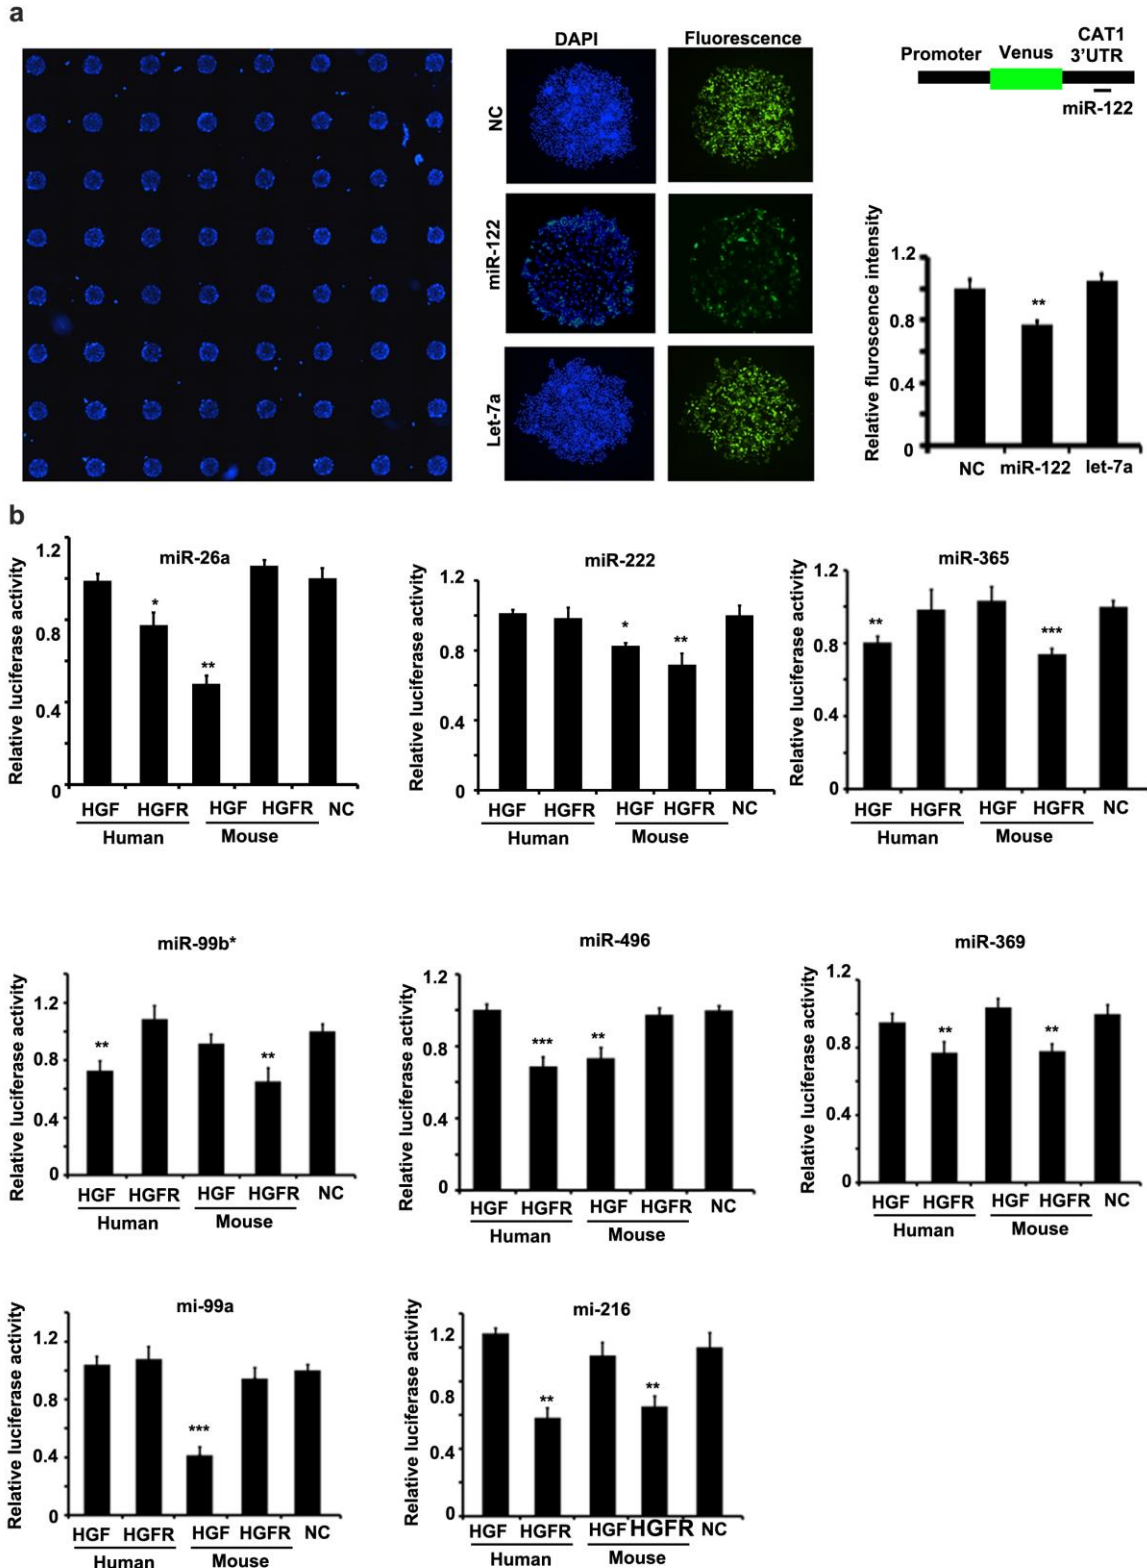

**Supplementary Figure S7. Genome-wide identification of miRNA targeting sites along HGF/HGFR, TGF $\beta$ 1/TGF $\beta$ R1, or FGF/FGFR**

a. SAM cell assays for the identification of miRNA targeting sites. (Left) an array of cell islands that cells were stained in DAPI was shown; (Middle, Right) Fluorescent signals

were quantified in cells expressing a Venus-3' UTR (CAT1) construct as well as indicated miRNAs.

b. Validation of randomly selected hits obtained in (A) by use of luciferase assay. Six independent repeats are performed in each experiment.

**Supplementary Figure S9. Western blot (Figure 1a)**

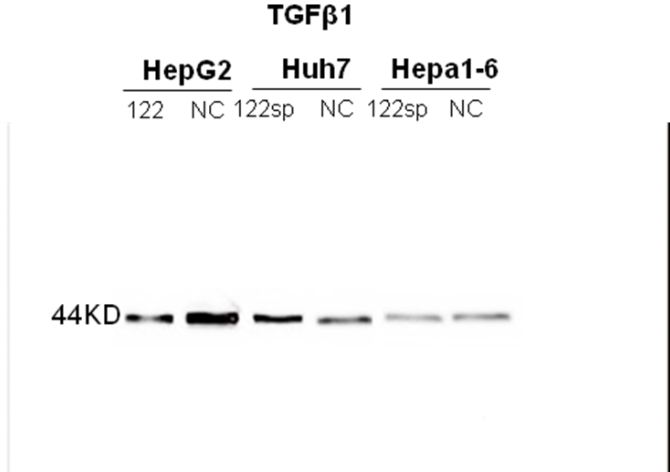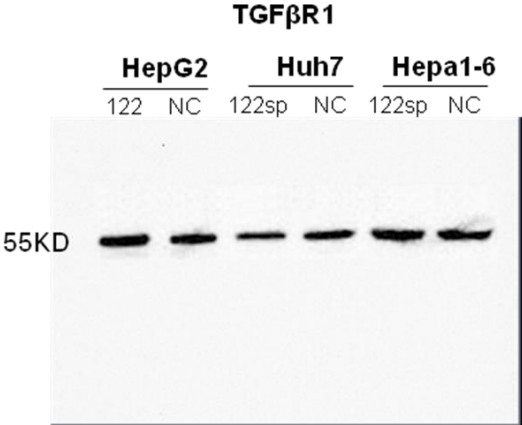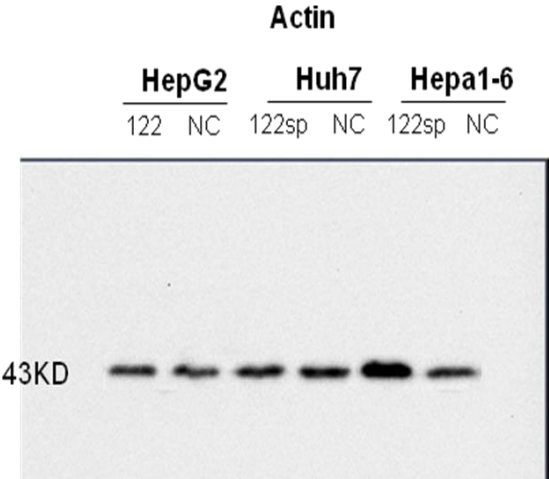

**Supplementary Figure S10.** Western blot (Figure 1c)

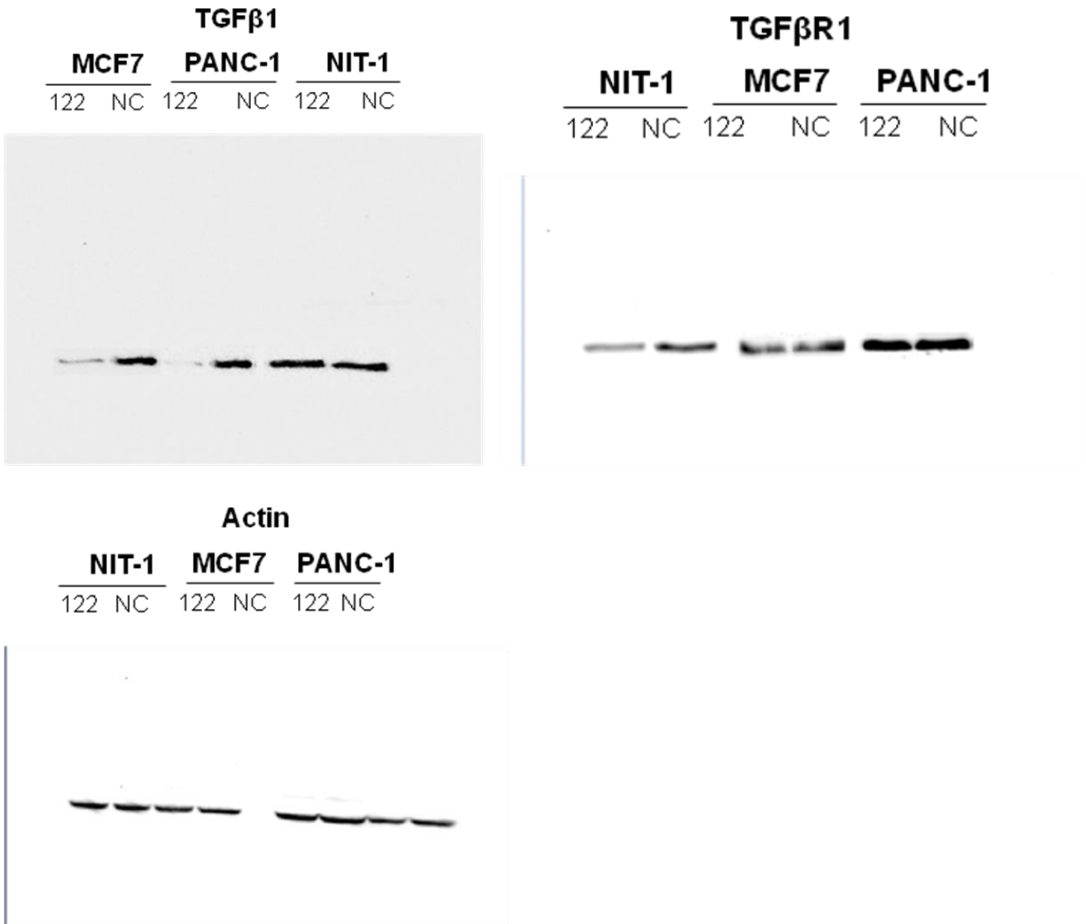

Supplementary Figure S11. Western blot (Figure 1e)

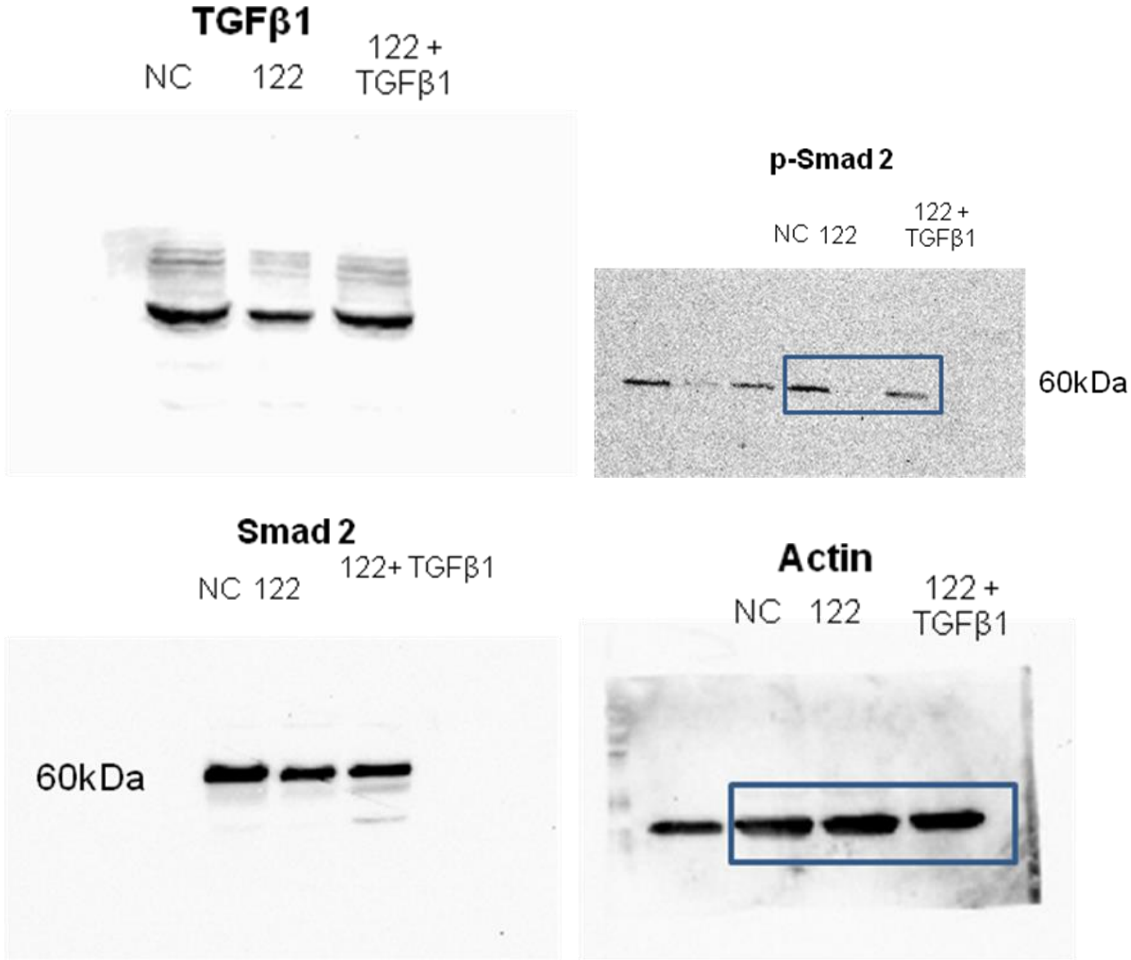



Supplementary Figure S12. Western blot (Figure 1f)

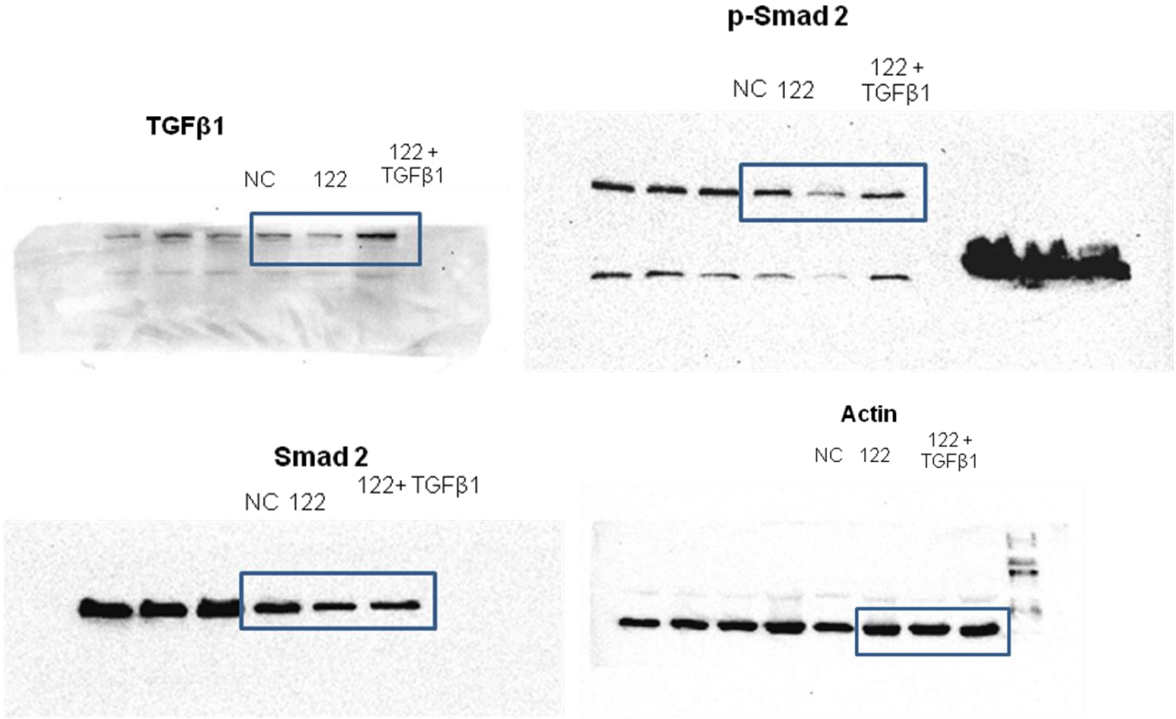

Supplementary Figure S13. Western blot (Figure 1g)

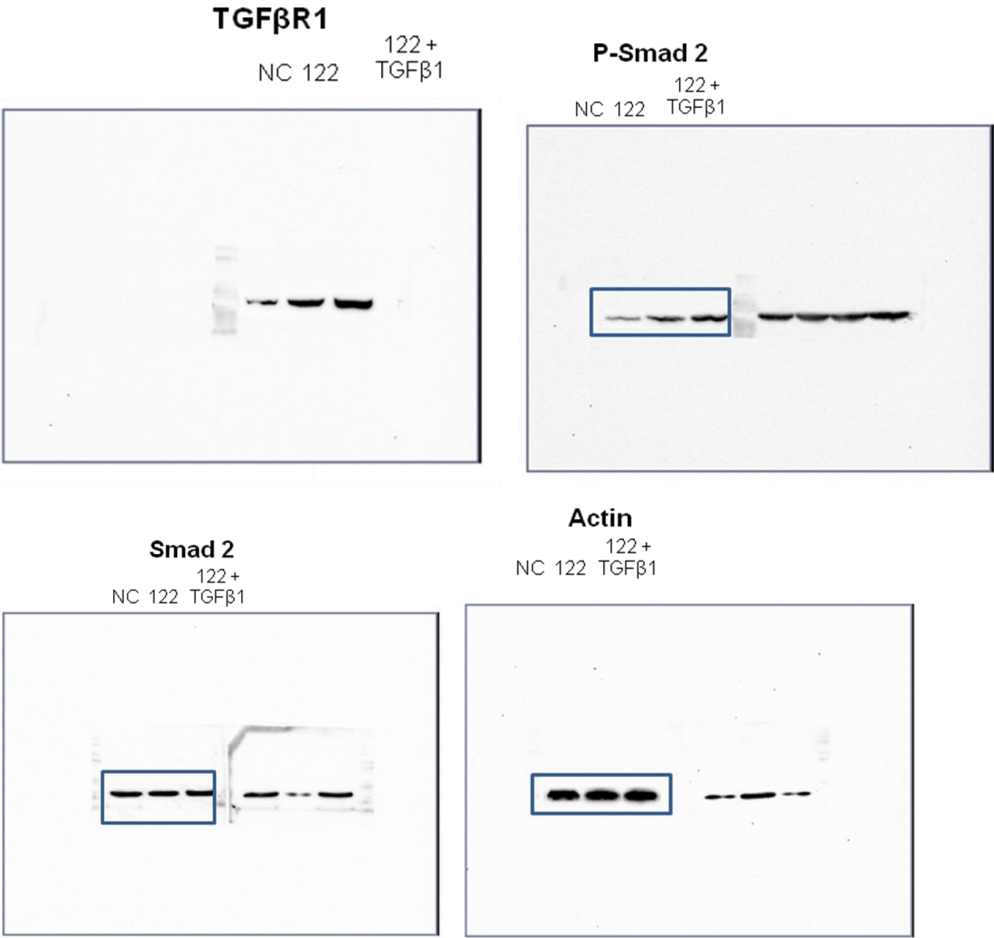

**Supplementary Figure S14.** Western blot (Figure 4a)

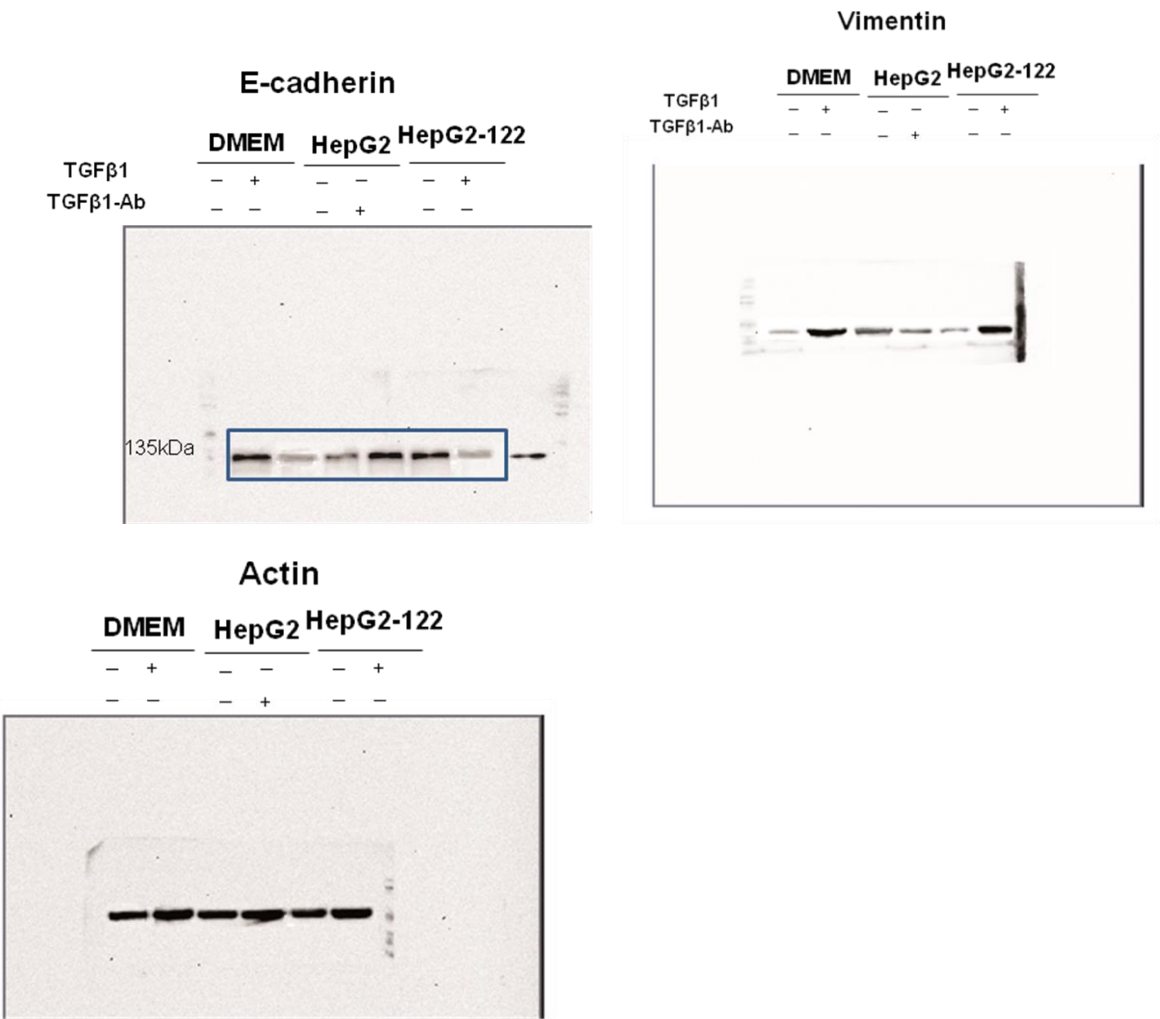

**Supplementary Figure S15.** Western blot (Figure 4f)

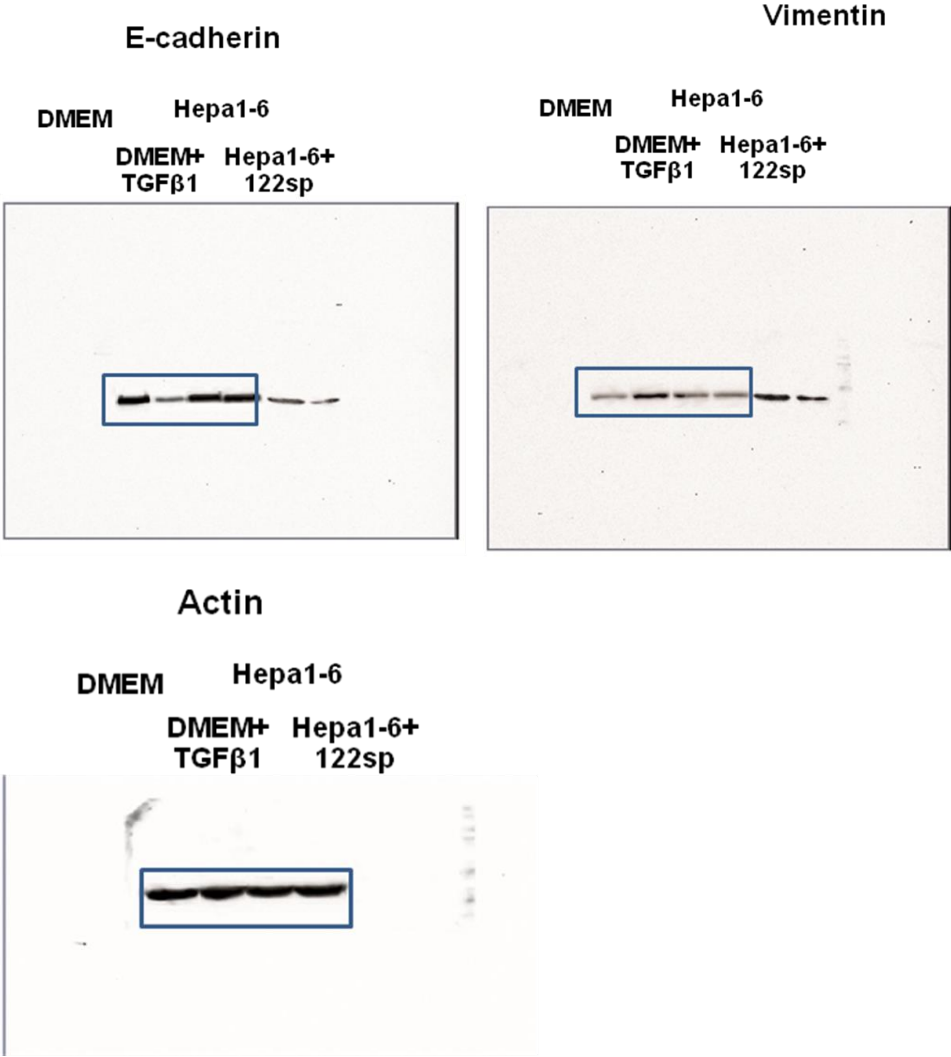

Supplementary Figure S16. Western blot (Figure s1e)

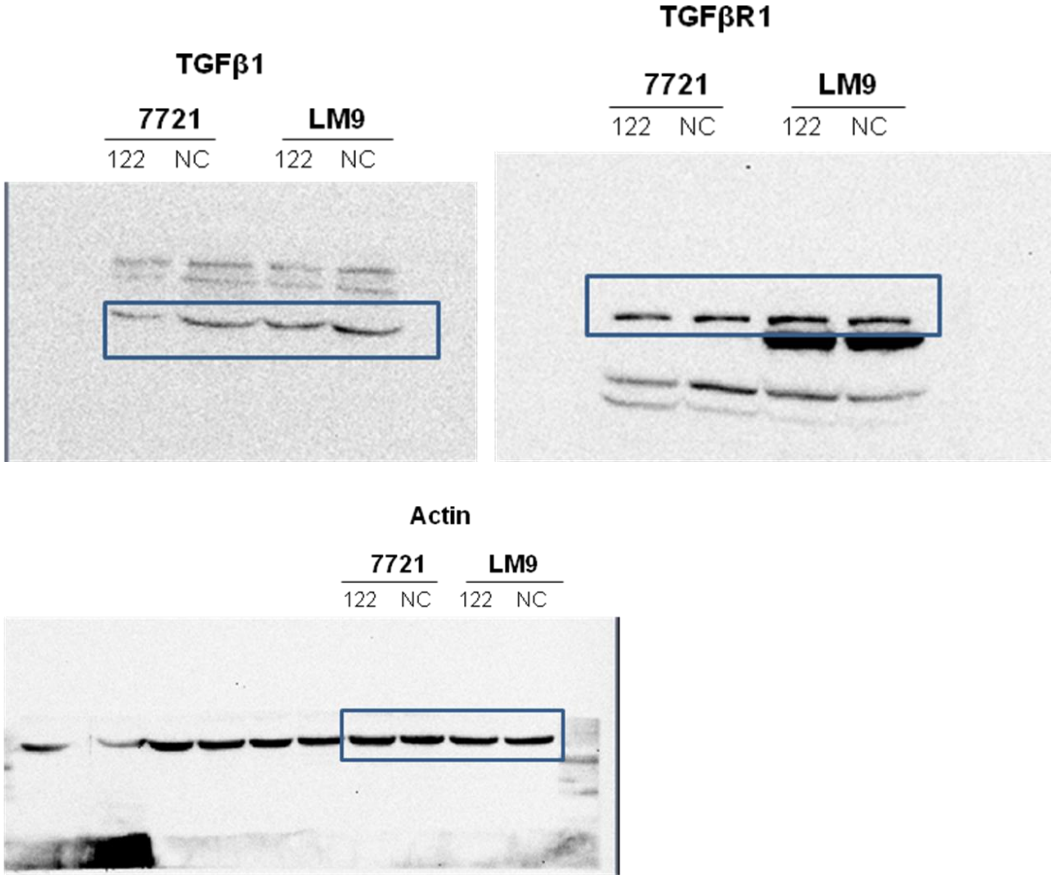

Supplementary Figure S17. Western blot (Figure s1f)

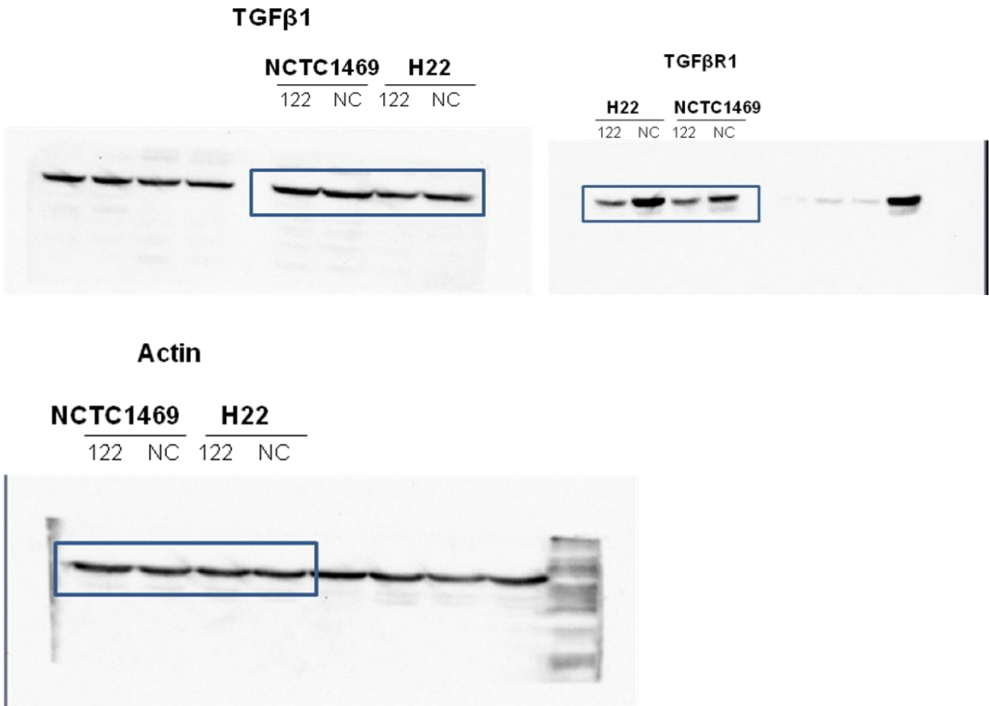

**Supplementary Figure S18. Western blot (Figure s6)**

**Human Liver Tumor TGFβ1**

T1 T2 T3 T4 N1 N2 N3 N4

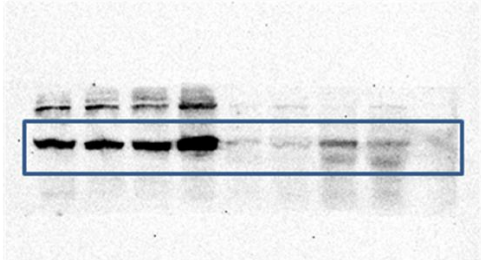

**Human Liver Tumor TGFβ1**

T7 T8 T9 T10 N7 N8 N9 N10

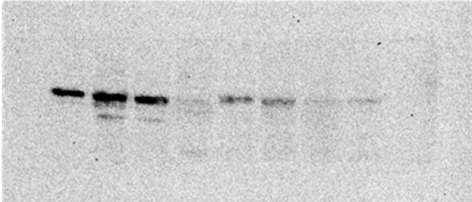

**Human Liver Tumor TGFβ1**

T11 N11 T5 N5 T6 N6

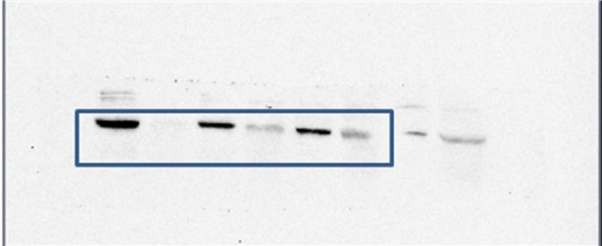

**Human Liver Tumor TGFβR1**

T1 N1 T2 N2 T3 N3 T4 N4

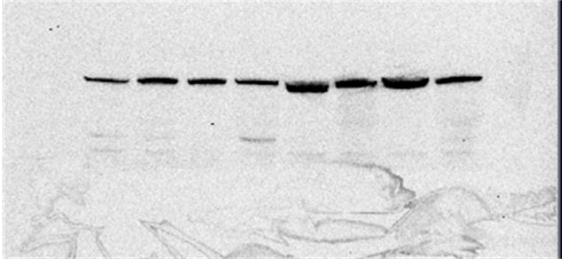

**Human Liver Tumor TGFβR1**

T7 N7 T8 N8 T9 N9 T10 N10

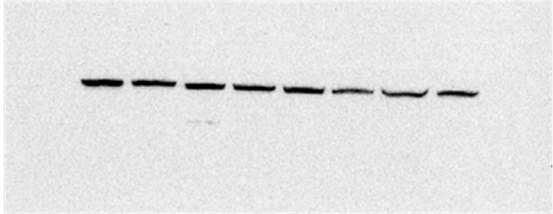

**Human Liver Tumor TGFβR1**

T11 N11 T5 N5 T6 N6

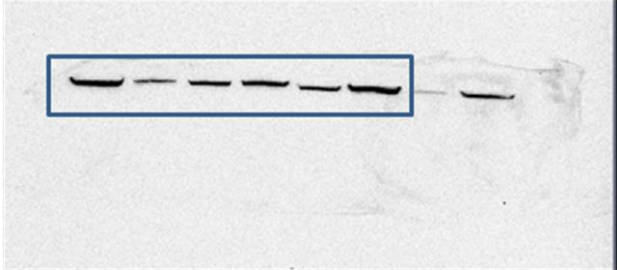

**Human Liver Tumor Actin**

T1 T2 T3 T4 N1 N2 N3 N4

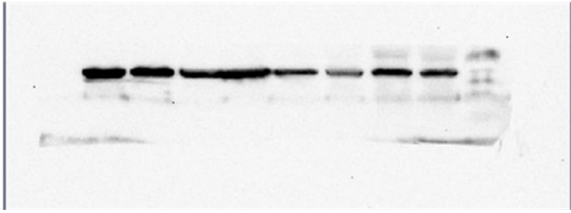

**Human Liver Tumor Actin**

T7 T8 T9 T10 N7 N8 N9 N10

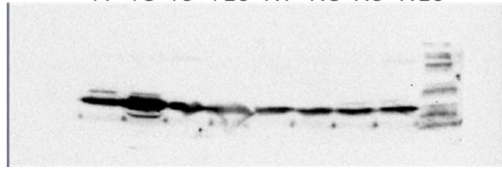

**Human Liver Tumor Actin**

T11 N11 T5 N5 T6 N6

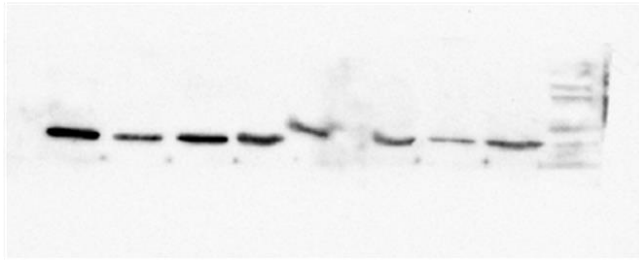



**Supplementary Table S1. Conserved TGF $\beta$ 1 5'UTR sequences from primates**

|                 |                          |
|-----------------|--------------------------|
| Human           | CGGGAGACCCCCAGCCCCTGCAGG |
| Chimp           | CGGGAGACCCCCAGCCCCTGCAGG |
| Gorilla         | CGGGAGACCCCCAGCCCCTGCAGG |
| Orangutan       | CGGGAGACCCCCAGCCCCTGCAGG |
| Rhesus          | CGGGAGACCCCCAGCCCCTGCAGG |
| Baboon          | CGGGAGACCCCCAGCCCCTGCAGG |
| Squirrel monkey | CGCGAGACCCCCAGCCCCTGCGGG |
| Bushbaby        | CGGGAGACCCCCAGCCCCTACAGG |

## Supplementary Table S2. TGF $\beta$ R1 Conserved CDS sequences from 100

### vertebrates

|                        |                                  |
|------------------------|----------------------------------|
| Negative               | GGGGTTTGTGTCATGACAGCTCGTGTTGGAAA |
| Positive               | TTAAACACCATTGTCACAACCTCAGTCAAC   |
| Human                  | TTAAGAAAACATTATCGCAACTCAGTCA     |
| Chimp                  | TTAAGAAAACATTATCGCAACTCAGTCA     |
| Gorilla                | TTAAGAAAACATTATCACAACCTCAGTCA    |
| Orangutan              | TTAAGAAAACATTATCACAACCTCAGTCA    |
| Gibbon                 | TTAAGAAAACATTATCACAACCTCAGTCA    |
| Rhesus                 | TTAAGAAAACATTATCACAACCTCAGTCA    |
| Crab-eating macaque    | TTAAGAAAACATTATCACAACCTCAGTCA    |
| Baboon                 | TTAAGAAAACATTATCACAACCTCAGTCA    |
| Green monkey           | TTAAGAAAACATTATCACAACCTCAGTCA    |
| Marmoset               | TTAAGAAAACATTATCACAACCTCAGTCA    |
| Squirrel monkey        | TTAAGAAAACATTATCACAACCTCAGTCA    |
| Bushbaby               | TTAAGAAAACATTGTCACAACCTCAGTCA    |
| Chinese tree shrew     | TCAAGAAAACCTTTGTCACAGCTCAGTCA    |
| Squirrel               | TTAAGAAGACATTGTCACAACCTCAGTCA    |
| Lesser Egyptian jerboa | TTAAAAAACATTGTCACAGCTCAGTCA      |
| Prairie vole           | TTAAAAAACATTGTCACAGCTCAGCCA      |
| Chinese hamster        | TTAAAAAACATTGTCACAGCTCAGCCA      |
| Golden hamster         | TTAAAAAACATTGTCACAGCTCAGCCA      |
| Mouse                  | TTAAAAAACATTGTCACAACCTCAGCCA     |
| Rat                    | TTAAAAAACATTGTCACAGCTCAGCCA      |
| Naked mole-rat         | TTAAGAAAACATTGTCACAACCTCAGTCA    |
| Guinea pig             | TTAAGAAAACATTGTCACAGCTCAGTCA     |
| Chinchilla             | TTAAGAAAACACTGTCACAACCTCAGTCA    |
| Brush-tailed rat       | TTAAGAAGACACTGTCACAACCTCAGTCA    |
| Rabbit                 | TTAAGAAAACATTGTCACAGCTCAGTCA     |
| Pika                   | TTAAGAAAACATTGTCACAGCTCAGTCA     |
| Pig                    | TTAAGAAAACATTGTCACAACCTCAGTCA    |
| Alpaca                 | TTAAGAAAACACTGTCACAGCTCAGTCA     |
| Bactrian camel         | TTAAGAAAACATTGTCGCAGCTCAGTCA     |
| Dolphin                | TTAAGAAAACATTATCACAGCTCAGTCA     |
| Killer whale           | TTAAGAAAACATTATCACAGCTCAGTCA     |
| Tibetan antelope       | TTAAGAAAACATTGTCACAACCTCAGT--    |
| Cow                    | TTAAGAAAACATTGTCACAACCTCAGTCA    |
| Sheep                  | TTAAGAAAACATTGTCACAACCTCAGTCA    |
| Domestic goat          | TTAAGAAAACATTGTCACAACCTCAGTCA    |
| Horse                  | TTAAGAAAACATTGTCACAGCTCAGTCA     |
| White rhinoceros       | TTAAGAAAACATTGTCACAACCTCAGTCA    |
| Cat                    | TTAAGAAAACATTGTCACAACCTCAGTCA    |

|                        |                                |
|------------------------|--------------------------------|
| Dog                    | TTAAGAAAACATTGTCACAACCTCAGTCA  |
| Ferret                 | TTAAGAAAACACTGTCACAACCTCAGTCA  |
| Panda                  | TTAAGAAAACATTGTCACAACCTCAGTCA  |
| Pacific walrus         | TTAAGAAAACATTGTCACAACCTCAGTCA  |
| Weddell seal           | TTAAGAAAACATTGTCACAACCTCAGTCA  |
| Black flying-fox       | TTAAGAAAACATTGTCACAACCTCAGTCA  |
| Megabat                | TTAAGAAAACATTGTCACAACCTCAGTCA  |
| David's myotis(bat)    | TTAAGAAAACCTTTGTCACAACCTCAGTCA |
| Microbat               | TTAAGAAAACCTTTGTCACAACCTCAGTCA |
| Big brown bat          | TTAAGAAAACCTTTGTCACAACCTCAGTCA |
| Hedgehog               | TTAAGAAGACATTGTCACAACCTCAGTCA  |
| Shrew                  | TTAAGAAGACTCTGTCACAGCTCAGCCA   |
| Star-nosed mole        | TTAAGAAAACATTGTCTCAACTCAGTCA   |
| Elephant               | TTAAGAAAACGTTATCACAACCTCAGTCA  |
| Cape elephant shrew    | TTAAGAAAACGTTATCACAGCTCAGTCA   |
| Manatee                | TTAAGAAAACATTATCACAACCTCAGTCA  |
| Cape golden mole       | TTAAGAAAACATTGTCACAGCTCAGCCA   |
| Tenrec                 | TTAAGAAAACACTGTCTCAACTCAGTCA   |
| Aardvark               | TCAAGAAGACGTTATCACAGCTCAGTCA   |
| Armadillo              | TTAAGAAAACATTATCACAGCTCAGCCA   |
| Opossum                | TTAAGAAGACATTATCACAGCTCAGTCA   |
| Tasmanian devil        | TTAAGAAAACATTATCACAACCTCAGTCA  |
| Wallaby                | TTAAGAAAACATTATCACAGCTCAGTCA   |
| Platypus               | TCAAGAAGACTCTGTCACAGCTCAGCCA   |
| Saker falcon           | TTAAGAAAACATTATCGCAACTTAGTCA   |
| Peregrine falcon       | TTAAGAAAACATTATCGCAACTTAGTCA   |
| Collared flycatcher    | TTAAGAAAACATTATCACAACCTTAGTCA  |
| White-throated sparrow | TTAAGAAAACATTATCACAACCTTAGTCA  |
| Medium ground finch    | TTAAGAAAACATTATCACAACCTTAGTCA  |
| Zebra finch            | TTAAGAAAACATTATCACAACCTTAGTCA  |
| Tibetan ground jay     | TTAAGAAAACATTATCGCAACTTAGCCA   |
| Budgerigar             | TTAAGAAAACGTTATCACAACCTTAGTCA  |
| Parrot                 | TTAAGAAAACGTTATCACAACCTTAGTCA  |
| Scarlet Macaw          | TTAAGAAAACGTTATCACAACCTTAGTCA  |
| Rock pigeon            | TTAAGAAAACATTATCGCAACTCAGTCA   |
| Mallard duck           | TTAAGAAAACATTATCACAGCTTAGTCA   |
| Chicken                | TTAAGAAAACACTATCACAACCTTAGTCA  |
| Turkey                 | TTAAGAAAACACTATCACAGCTTAGTCA   |
| American alligator     | TTAAGAAAACATTATCACAGCTCAGTCA   |
| Green seaturtle        | TTAAGAAAACATTATCACAGCTCAGCCA   |
| Painted turtle         | TTAAGAAAACATTATCACAGCTCAGCCA   |
| Soft-shell Turtle      | TTAAGAAAACATTATCACAGCTCAGTCA   |
| Spiny softshell turtle | TTAAGAAAACATTATCACAGCTCAGTCA   |
| Lizard                 | TAAAGAAAACATTATCGCAGCTTAGTCA   |

|                          |                               |
|--------------------------|-------------------------------|
| X. tropicalis            | TCAAGAAAACGTTGTCACAACCTAAGCCA |
| Coelacanth               | TGAAGAAAACACTATCACAACCTGAGTCA |
| Tetraodon                | TCAAAAAGACGCTGTCCCAGCTCAGCCA  |
| Fugu                     | TCAAAAAGACGCTGTCTCAGCTCAGCCA  |
| Tawny puffer fish        | TCAAAAAGACCCTGTGCGCAGCTCAGCAT |
| Nile tilapia             | TCAAGAAAACACTGTCTCAGCTCAGCCA  |
| Princess of Burundi      | TCAAGAAAACGCTGTCTCAGCTCAGCCA  |
| Burton's mouth breeder   | TCAAGAAGACTTTGTCTCAGCTCAGCGT  |
| Zebra Mbuna              | TCAAGAAAACGCTGTCTCAGCTCAGCCA  |
| Pundamilia nyererei      | TCAAGAAAACGCTGTCTCAGCTCAGCCA  |
| Medaka                   | TCAAGAAGACGCTGTCCCAGCTCAGCCA  |
| Southern platyfish       | TCAAGAAAACCTGTATCTCAACT--GTCT |
| Stickleback              | TCAAGAAGACCCTGTCTCAGCTCAGCCA  |
| Atlantic cod             | TCAAGAAGACGCTGTCCCAGCTCAGCCA  |
| Zebrafish                | TCAAGAAGTCACTGTCCCAGCTCAGTCA  |
| Mexican tetra (cavefish) | TCAAGAAGACCCTGTCCCAGCTCAGCCA  |
| Spotted gar              | TTAAGAAGACATTGTACAGCTCAGCCA   |
| Lamprey                  | TCAAGAAGACCCTCTCGCAGCTGAGCCA  |

**Supplementary Table S3. A list of miRNAs examined by use of SAMcell**

|         |           |             |            |            |             |
|---------|-----------|-------------|------------|------------|-------------|
| miR-1   | miR-335   | miR-125b    | miR-208b   | miR-331-3p | miR-671-5p  |
| miR-9   | miR-340   | miR-125b-3p | miR-20a    | miR-331-5p | miR-708*    |
| miR-16  | miR-363   | miR-126*    | miR-20b    | miR-335*   | miR-7-1*    |
| miR-17  | miR-365   | miR-127-3p  | miR-214*   | miR-338-3p | miR-744-3p  |
| miR-21  | miR-370   | miR-127-5p  | miR-216a   | miR-338-5p | miR-875-5p  |
| miR-22  | miR-377   | miR-129*    | miR-216b   | miR-33a    | miR-9*      |
| miR-24  | miR-378   | miR-129-3p  | miR-218-2* | miR-33a*   | miR-92b     |
| miR-32  | miR-379   | miR-129-5p  | miR-219-5p | miR-340-3p | miR-93*     |
| miR-93  | miR-381   | miR-130a    | miR-22-5p  | miR-342-3P | miR-99a     |
| miR-98  | miR-382   | miR-130b    | miR-23a    | miR-34a    | miR-99b     |
| miR-100 | miR-410   | miR-133a    | miR-23b    | miR-34c-5p | miR-99b*    |
| miR-101 | miR-421   | miR-133b    | miR-26a    | miR-361-5p | let7a       |
| miR-103 | miR-425   | miR-140-3p  | miR-26b    | miR-369-3p | let-7b      |
| miR-107 | miR-431   | miR-140-5p  | miR-26b*   | miR-369-5P | let-7b-3p   |
| miR-122 | miR-433   | miR-142-3p  | miR-27a-5p | miR-374b   | let-7c      |
| miR-124 | miR-448   | miR-146a    | miR-27b    | miR-376a   | let-7d      |
| miR-126 | miR-451   | miR-146b-5p | miR-27b*   | miR-378*   | let-7d-3p   |
| miR-128 | miR-484   | miR-147b    | miR-296-3p | miR-378b   | let-7e      |
| miR-132 | miR-494   | miR-148a    | miR-296-5p | miR-409-3p | let-7f      |
| miR-137 | miR-495   | miR-148a*   | miR-299-5p | miR-409-5p | let-7f-1-3p |
| miR-138 | miR-496   | miR-148b    | miR-29a    | miR-411-3p | let-7g      |
| miR-141 | miR-504   | miR-151-5p  | miR-29a*   | miR-423-3p | let-7i      |
| miR-143 | miR-539   | miR-154*    | miR-29b    | miR-423-5P | let7i-3p    |
| miR-145 | miR-543   | miR-15a     | miR-29c    | miR-431-3p | miR-10a     |
| miR-150 | miR-557   | miR-15b     | miR-29c*   | miR-449a   | miR-125a-3p |
| miR-153 | miR-568   | miR-15b*    | miR-301a   | miR-450a   | miR-134     |
| miR-154 | miR-638   | miR-181a    | miR-302a   | miR-455-5p | miR-135b    |
| miR-183 | miR-652   | miR-181a*   | miR-302c   | miR-485-5p | miR-139-5p  |
| miR-184 | miR-653   | miR-181b    | miR-302d   | miR-486-5p | miR-144     |
| miR-185 | miR-663   | miR-181c    | miR-30a    | miR-487a   | miR-149     |
| miR-186 | miR-708   | miR-181d    | miR-30a*   | miR-490-3p | miR-152     |
| miR-187 | miR-711   | miR-183*    | miR-30b    | miR-491-5p | miR-18a     |
| miR-190 | miR-744   | miR-188-3p  | miR-30c    | miR-499-5p | miR-190b    |
| miR-191 | miR-759   | miR-188-5p  | miR-30c-1* | miR-532-3p | miR-192     |
| miR-194 | miR-761   | miR-193a-3p | miR-30c-2* | miR-532-5p | miR-200b    |
| miR-195 | miR-874   | miR-196a    | miR-30d    | miR-542-3p | miR-200c    |
| miR-204 | miR-877   | miR-196b    | miR-30e    | miR-551b   | miR-203     |
| miR-205 | miR-1197  | miR-199b-3p | miR-30e*   | miR-574-3p | miR-25      |
| miR-210 | miR-106b  | miR-199b-5p | miR-320a   | miR-574-5p | miR-28-5p   |
| miR-214 | miR-106b* | miR-19a     | miR-323-3p | miR-590-3p | miR-367     |
| miR-218 | miR-10a*  | miR-19b     | miR-323-5p | miR-590-5p | miR-7       |

|         |             |           |             |            |         |
|---------|-------------|-----------|-------------|------------|---------|
| miR-221 | miR-10b     | miR-200b* | miR-323b-5p | miR-615-5p | miR-760 |
| miR-222 | miR-124*    | miR-200c* | miR-324-5P  | miR-654-3p |         |
| miR-223 | miR-125a-5p | miR-208a  | miR-330-5p  | miR-671-3p |         |

**Supplementary Table S4. miRNA hits targeting HGF or HGFR in humans or mice**

| miRNA     | Fold change |       |       |       | P value |       |       |       |
|-----------|-------------|-------|-------|-------|---------|-------|-------|-------|
|           | H-HGF       | H-MET | M-HGF | M-MET | H-HGF   | H-MET | M-HGF | M-MET |
| let-7b    | 0.914       | 0.948 | 1.028 | 0.945 | 0.008   | 0.115 | 0.495 | 0.122 |
| let-7b-3p | 1.052       | 0.907 | 0.972 | 0.963 | 0.218   | 0.035 | 0.709 | 0.357 |
| let-7c    | 0.901       | 0.972 | 0.889 | 0.955 | 0.009   | 0.518 | 0.005 | 0.354 |
| let-7d    | 1.046       | 0.919 | 0.905 | 0.973 | 0.219   | 0.013 | 0.027 | 0.344 |
| let-7g    | 1.003       | 0.912 | 0.863 | 0.938 | 0.955   | 0.041 | 0.029 | 0.290 |
| 10a*      | 0.912       | 0.935 | 1.014 | 0.999 | 0.012   | 0.322 | 0.769 | 0.979 |
| 15b*      | 0.918       | 0.975 | 0.867 | 0.974 | 0.048   | 0.315 | 0.040 | 0.637 |
| 16        | 1.004       | 1.031 | 0.856 | 0.961 | 0.942   | 0.582 | 0.011 | 0.499 |
| 19b       | 0.882       | 1.056 | 1.040 | 0.977 | 0.006   | 0.153 | 0.277 | 0.562 |
| 20b       | 0.917       | 1.010 | 0.988 | 0.922 | 0.010   | 0.769 | 0.841 | 0.047 |
| 22-5p     | 0.975       | 0.898 | 0.923 | 0.955 | 0.328   | 0.000 | 0.045 | 0.113 |
| 24        | 1.014       | 0.921 | 0.932 | 1.009 | 0.722   | 0.032 | 0.127 | 0.830 |
| 25        | 0.853       | 0.998 | 0.976 | 0.932 | 0.019   | 0.963 | 0.650 | 0.224 |
| 26a       | 1.046       | 0.825 | 0.887 | 0.977 | 0.475   | 0.000 | 0.047 | 0.525 |
| 27b       | 0.920       | 1.005 | 0.966 | 0.984 | 0.036   | 0.924 | 0.396 | 0.669 |
| 27b*      | 0.796       | 1.062 | 1.046 | 0.964 | 0.003   | 0.125 | 0.233 | 0.215 |
| 29a*      | 1.113       | 0.962 | 1.026 | 0.922 | 0.005   | 0.314 | 0.574 | 0.026 |
| 30c       | 0.994       | 1.050 | 0.986 | 0.924 | 0.943   | 0.198 | 0.882 | 0.037 |
| 30c-1*    | 1.023       | 0.923 | 1.060 | 1.067 | 0.518   | 0.025 | 0.124 | 0.247 |
| 30e       | 0.899       | 0.975 | 1.032 | 0.934 | 0.011   | 0.630 | 0.392 | 0.416 |
| 32        | 0.935       | 0.896 | 0.949 | 1.034 | 0.158   | 0.024 | 0.384 | 0.504 |
| 33a       | 0.891       | 0.993 | 1.001 | 0.986 | 0.034   | 0.897 | 0.976 | 0.659 |
| 92b       | 1.005       | 0.889 | 1.031 | 0.992 | 0.917   | 0.001 | 0.397 | 0.867 |
| 93*       | 0.919       | 1.049 | 1.077 | 0.890 | 0.046   | 0.343 | 0.137 | 0.046 |
| 98        | 1.031       | 0.967 | 0.907 | 0.960 | 0.089   | 0.363 | 0.014 | 0.405 |
| 99a       | 1.065       | 1.041 | 0.793 | 0.975 | 0.063   | 0.137 | 0.000 | 0.543 |
| 99b*      | 0.849       | 0.970 | 0.999 | 0.898 | 0.002   | 0.652 | 0.980 | 0.022 |
| 103       | 0.887       | 0.936 | 1.093 | 1.007 | 0.034   | 0.169 | 0.181 | 0.868 |
| 106b      | 1.073       | 1.053 | 0.801 | 1.022 | 0.096   | 0.357 | 0.010 | 0.469 |
| 106b*     | 1.026       | 0.817 | 0.963 | 0.946 | 0.503   | 0.004 | 0.514 | 0.024 |
| 125a-3p   | 0.975       | 0.992 | 0.845 | 1.024 | 0.465   | 0.804 | 0.000 | 0.524 |
| 125a-5p   | 0.902       | 0.875 | 0.894 | 0.969 | 0.531   | 0.003 | 0.028 | 0.566 |
| 126*      | 0.920       | 1.027 | 0.839 | 0.992 | 0.018   | 0.631 | 0.001 | 0.813 |
| 127-5p    | 0.872       | 0.957 | 1.009 | 0.918 | 0.023   | 0.213 | 0.897 | 0.012 |
| 128       | 0.902       | 0.781 | 1.044 | 1.034 | 0.017   | 0.001 | 0.484 | 0.221 |
| 129*      | 1.016       | 0.915 | 1.059 | 1.068 | 0.437   | 0.044 | 0.315 | 0.036 |
| 129-3p    | 1.042       | 0.998 | 0.822 | 0.936 | 0.207   | 0.969 | 0.029 | 0.074 |
| 129-5p    | 1.029       | 0.885 | 0.948 | 0.935 | 0.576   | 0.002 | 0.289 | 0.060 |
| 130b      | 1.041       | 1.026 | 0.870 | 0.954 | 0.342   | 0.670 | 0.018 | 0.077 |
| 133a      | 0.871       | 0.960 | 0.885 | 0.907 | 0.000   | 0.533 | 0.046 | 0.108 |

|        |       |       |       |       |       |       |       |       |
|--------|-------|-------|-------|-------|-------|-------|-------|-------|
| 137    | 0.919 | 0.934 | 0.937 | 0.922 | 0.007 | 0.100 | 0.091 | 0.046 |
| 139-5p | 0.870 | 0.987 | 0.999 | 0.912 | 0.000 | 0.701 | 0.990 | 0.048 |
| 140-3p | 1.019 | 1.067 | 0.825 | 0.917 | 0.607 | 0.209 | 0.001 | 0.013 |
| 141    | 0.905 | 1.029 | 0.932 | 1.001 | 0.046 | 0.693 | 0.296 | 0.980 |
| 144    | 0.759 | 1.017 | 0.969 | 0.978 | 0.000 | 0.655 | 0.647 | 0.711 |
| 145    | 0.881 | 0.962 | 1.098 | 1.010 | 0.017 | 0.363 | 0.099 | 0.777 |
| 148a   | 1.045 | 0.852 | 1.084 | 0.957 | 0.382 | 0.010 | 0.126 | 0.145 |
| 150    | 0.968 | 0.914 | 0.815 | 0.946 | 0.260 | 0.019 | 0.000 | 0.059 |
| 152    | 0.921 | 1.013 | 1.000 | 1.088 | 0.266 | 0.705 | 0.999 | 0.098 |
| 154*   | 0.999 | 0.821 | 0.955 | 0.914 | 0.973 | 0.018 | 0.427 | 0.014 |
| 181a   | 1.259 | 1.076 | 0.996 | 0.912 | 0.035 | 0.104 | 0.940 | 0.047 |
| 181a*  | 0.955 | 0.905 | 0.966 | 1.046 | 0.163 | 0.001 | 0.311 | 0.573 |
| 183*   | 0.899 | 1.014 | 1.024 | 0.975 | 0.013 | 0.770 | 0.544 | 0.519 |
| 186    | 0.936 | 1.018 | 0.869 | 0.901 | 0.089 | 0.694 | 0.029 | 0.001 |
| 188-5p | 0.898 | 0.899 | 0.951 | 0.998 | 0.050 | 0.015 | 0.285 | 0.936 |
| 196a   | 1.005 | 0.918 | 0.917 | 0.996 | 0.899 | 0.044 | 0.048 | 0.902 |
| 196b   | 0.920 | 1.079 | 0.874 | 0.985 | 0.069 | 0.010 | 0.043 | 0.745 |
| 200b   | 0.869 | 0.983 | 0.938 | 0.982 | 0.013 | 0.617 | 0.428 | 0.699 |
| 200c*  | 1.073 | 1.041 | 0.823 | 0.964 | 0.031 | 0.289 | 0.032 | 0.279 |
| 203    | 1.066 | 0.922 | 1.036 | 1.059 | 0.299 | 0.020 | 0.673 | 0.095 |
| 208a   | 0.953 | 1.066 | 0.993 | 0.878 | 0.157 | 0.093 | 0.924 | 0.019 |
| 208b   | 0.890 | 1.127 | 1.032 | 1.018 | 0.016 | 0.328 | 0.566 | 0.622 |
| 216a   | 0.984 | 0.920 | 0.984 | 0.918 | 0.560 | 0.005 | 0.857 | 0.037 |
| 218    | 1.026 | 0.957 | 0.915 | 1.007 | 0.498 | 0.167 | 0.042 | 0.920 |
| 222    | 0.925 | 1.053 | 0.842 | 0.874 | 0.003 | 0.142 | 0.025 | 0.025 |
| 223    | 1.009 | 0.835 | 0.936 | 1.017 | 0.895 | 0.000 | 0.196 | 0.643 |
| 296-3p | 0.958 | 1.002 | 0.726 | 0.889 | 0.213 | 0.960 | 0.000 | 0.037 |
| 301a   | 0.973 | 0.990 | 0.834 | 0.969 | 0.311 | 0.726 | 0.009 | 0.593 |
| 302a   | 0.946 | 1.042 | 0.903 | 1.055 | 0.104 | 0.765 | 0.044 | 0.436 |
| 302c   | 0.969 | 1.041 | 0.840 | 1.024 | 0.453 | 0.312 | 0.002 | 0.524 |
| 323-3p | 0.993 | 0.936 | 0.884 | 1.032 | 0.803 | 0.101 | 0.012 | 0.285 |
| 323-5p | 1.036 | 0.973 | 0.884 | 1.012 | 0.134 | 0.448 | 0.008 | 0.792 |
| 331-5p | 0.988 | 0.913 | 0.880 | 1.081 | 0.663 | 0.001 | 0.018 | 0.146 |
| 335    | 0.954 | 0.965 | 1.026 | 0.894 | 0.284 | 0.138 | 0.677 | 0.004 |
| 335*   | 0.922 | 1.004 | 1.086 | 0.912 | 0.047 | 0.921 | 0.216 | 0.017 |
| 338-5p | 1.034 | 0.906 | 0.964 | 1.014 | 0.422 | 0.001 | 0.429 | 0.790 |
| 342-3P | 0.923 | 0.981 | 1.061 | 0.915 | 0.020 | 0.613 | 0.285 | 0.048 |
| 361-5p | 0.923 | 0.913 | 0.954 | 0.982 | 0.020 | 0.005 | 0.362 | 0.477 |
| 363    | 0.834 | 1.005 | 0.966 | 0.985 | 0.019 | 0.870 | 0.445 | 0.591 |
| 365    | 0.841 | 0.986 | 0.929 | 0.921 | 0.006 | 0.638 | 0.311 | 0.040 |
| 369-3p | 0.908 | 0.990 | 1.023 | 0.975 | 0.003 | 0.774 | 0.643 | 0.474 |
| 369-5P | 0.955 | 0.921 | 0.983 | 0.921 | 0.401 | 0.008 | 0.753 | 0.032 |
| 374b   | 0.924 | 0.991 | 1.029 | 0.985 | 0.012 | 0.831 | 0.189 | 0.636 |
| 377    | 0.955 | 0.971 | 0.761 | 1.019 | 0.171 | 0.472 | 0.000 | 0.566 |



|        |       |       |       |       |       |       |       |       |
|--------|-------|-------|-------|-------|-------|-------|-------|-------|
| 409-3p | 0.860 | 1.004 | 1.007 | 0.967 | 0.000 | 0.909 | 0.883 | 0.235 |
| 410    | 1.066 | 0.882 | 0.944 | 1.048 | 0.068 | 0.031 | 0.251 | 0.106 |
| 411-3p | 0.969 | 0.899 | 1.046 | 1.030 | 0.192 | 0.000 | 0.560 | 0.579 |
| 425    | 0.916 | 1.035 | 1.043 | 0.914 | 0.041 | 0.309 | 0.270 | 0.033 |
| 431    | 0.917 | 1.023 | 0.966 | 1.033 | 0.049 | 0.616 | 0.624 | 0.442 |
| 431-3p | 0.908 | 0.952 | 1.001 | 0.842 | 0.005 | 0.291 | 0.991 | 0.016 |
| 448    | 0.932 | 0.940 | 0.818 | 1.007 | 0.030 | 0.097 | 0.003 | 0.834 |
| 450a   | 0.954 | 0.962 | 0.982 | 1.033 | 0.147 | 0.231 | 0.774 | 0.416 |
| 455-5p | 0.884 | 0.942 | 0.854 | 0.936 | 0.008 | 0.249 | 0.005 | 0.086 |
| 490-3p | 1.032 | 0.959 | 0.912 | 0.934 | 0.064 | 0.193 | 0.009 | 0.077 |
| 495    | 1.048 | 0.989 | 0.902 | 0.940 | 0.155 | 0.831 | 0.037 | 0.131 |
| 496    | 0.981 | 0.904 | 0.922 | 0.947 | 0.550 | 0.004 | 0.003 | 0.358 |
| 504    | 0.850 | 0.965 | 1.055 | 0.973 | 0.015 | 0.387 | 0.248 | 0.549 |
| 539    | 0.920 | 1.052 | 1.027 | 0.983 | 0.015 | 0.123 | 0.657 | 0.658 |
| 542-3p | 0.960 | 0.984 | 1.056 | 0.900 | 0.322 | 0.581 | 0.207 | 0.026 |
| 574-5p | 0.994 | 1.011 | 1.063 | 0.906 | 0.899 | 0.692 | 0.138 | 0.019 |
| 590-5p | 1.019 | 0.855 | 0.986 | 1.024 | 0.620 | 0.002 | 0.822 | 0.544 |
| 652    | 1.037 | 0.989 | 0.925 | 0.952 | 0.058 | 0.716 | 0.036 | 0.266 |
| 653    | 0.896 | 0.995 | 0.969 | 0.864 | 0.005 | 0.908 | 0.578 | 0.018 |
| 708    | 0.838 | 1.014 | 0.989 | 0.950 | 0.004 | 0.705 | 0.895 | 0.091 |
| 708*   | 1.008 | 0.909 | 0.777 | 0.955 | 0.724 | 0.005 | 0.000 | 0.281 |
| 744-3p | 0.898 | 0.857 | 0.976 | 1.084 | 0.009 | 0.000 | 0.683 | 0.315 |
| 761    | 0.944 | 0.913 | 0.963 | 0.957 | 0.566 | 0.031 | 0.487 | 0.310 |
| 1197   | 0.914 | 1.128 | 0.814 | 0.958 | 0.037 | 0.015 | 0.003 | 0.495 |

**Note:** Hits with cutoff of 0.92 and p-value <0.05 were highlighted in red.

**Supplementary Table S5. miRNA hits targeting FGF or FGFR in humans or mice**

| miRNAs      | Fold change |         |        |         | P value |         |        |         |
|-------------|-------------|---------|--------|---------|---------|---------|--------|---------|
|             | H-FGF1      | H-FGFR1 | M-FGF1 | M-FGFR1 | H-FGF1  | H-FGFR1 | M-FGF1 | M-FGFR1 |
| let-7b      | 0.941       | 1.055   | 0.843  | 0.980   | 0.323   | 0.402   | 0.028  | 0.533   |
| let-7b-3p   | 0.977       | 1.015   | 1.082  | 0.849   | 0.681   | 0.642   | 0.273  | 0.018   |
| let-7f-1-3p | 0.958       | 1.030   | 0.794  | 0.948   | 0.409   | 0.555   | 0.002  | 0.373   |
| let-7i      | 0.889       | 0.915   | 1.051  | 0.944   | 0.082   | 0.023   | 0.159  | 0.042   |
| let-7i-3p   | 0.860       | 0.989   | 0.855  | 1.053   | 0.028   | 0.775   | 0.025  | 0.333   |
| 7           | 0.942       | 0.892   | 1.046  | 1.023   | 0.081   | 0.041   | 0.195  | 0.547   |
| 10a         | 0.997       | 0.952   | 0.866  | 0.992   | 0.931   | 0.080   | 0.047  | 0.892   |
| 19a         | 1.057       | 0.908   | 0.973  | 0.984   | 0.385   | 0.004   | 0.615  | 0.732   |
| 22-5p       | 0.918       | 0.914   | 0.917  | 0.946   | 0.153   | 0.014   | 0.015  | 0.301   |
| 25          | 0.887       | 0.959   | 1.096  | 1.062   | 0.022   | 0.103   | 0.083  | 0.133   |
| 26a         | 0.933       | 1.109   | 0.937  | 0.882   | 0.274   | 0.092   | 0.077  | 0.003   |
| 26b         | 0.892       | 1.004   | 0.912  | 1.079   | 0.007   | 0.911   | 0.019  | 0.119   |
| 27a-5p      | 0.922       | 1.013   | 0.985  | 1.054   | 0.037   | 0.719   | 0.700  | 0.046   |
| 29a         | 1.005       | 0.919   | 0.916  | 0.906   | 0.900   | 0.106   | 0.030  | 0.046   |
| 29a*        | 0.917       | 1.006   | 0.915  | 1.066   | 0.002   | 0.907   | 0.038  | 0.145   |
| 29b         | 1.020       | 0.933   | 0.979  | 0.884   | 0.564   | 0.122   | 0.720  | 0.032   |
| 29c         | 1.008       | 0.891   | 1.095  | 0.941   | 0.845   | 0.039   | 0.159  | 0.004   |
| 30c-2*      | 0.936       | 0.902   | 1.023  | 0.969   | 0.020   | 0.032   | 0.427  | 0.368   |
| 32          | 0.914       | 0.995   | 1.002  | 1.005   | 0.031   | 0.955   | 0.957  | 0.833   |
| 34c-5p      | 1.129       | 1.006   | 1.003  | 0.878   | 0.017   | 0.848   | 0.954  | 0.002   |
| 92b         | 1.045       | 0.840   | 0.990  | 1.045   | 0.212   | 0.000   | 0.771  | 0.264   |
| 93*         | 0.910       | 1.118   | 0.944  | 0.979   | 0.001   | 0.090   | 0.070  | 0.503   |
| 103         | 0.914       | 0.919   | 1.108  | 0.862   | 0.008   | 0.185   | 0.346  | 0.002   |
| 107         | 1.001       | 0.893   | 1.017  | 0.904   | 0.972   | 0.008   | 0.618  | 0.003   |
| 125a-3p     | 1.084       | 0.919   | 0.971  | 0.771   | 0.012   | 0.017   | 0.357  | 0.004   |
| 125b        | 0.972       | 0.895   | 0.903  | 0.989   | 0.565   | 0.045   | 0.021  | 0.730   |
| 125b-1-3p   | 0.857       | 1.073   | 1.044  | 0.933   | 0.001   | 0.164   | 0.243  | 0.208   |
| 128         | 0.918       | 0.973   | 0.979  | 0.843   | 0.035   | 0.441   | 0.715  | 0.005   |
| 129-5p      | 0.929       | 1.159   | 0.922  | 0.906   | 0.298   | 0.029   | 0.062  | 0.013   |
| 129*        | 0.894       | 0.995   | 0.931  | 0.918   | 0.012   | 0.893   | 0.114  | 0.049   |
| 133a        | 1.060       | 1.053   | 0.861  | 0.973   | 0.301   | 0.172   | 0.043  | 0.522   |
| 135b        | 0.982       | 0.842   | 0.917  | 0.908   | 0.545   | 0.004   | 0.049  | 0.300   |
| 137         | 0.913       | 0.936   | 0.992  | 0.909   | 0.027   | 0.250   | 0.861  | 0.018   |
| 139-5p      | 0.825       | 1.026   | 0.911  | 0.987   | 0.001   | 0.487   | 0.025  | 0.640   |
| 140-5p      | 0.858       | 0.948   | 1.045  | 1.072   | 0.001   | 0.077   | 0.603  | 0.610   |
| 144         | 0.864       | 0.980   | 1.011  | 1.014   | 0.002   | 0.523   | 0.799  | 0.641   |
| 145         | 0.870       | 0.905   | 0.964  | 0.964   | 0.000   | 0.005   | 0.494  | 0.498   |
| 146b-5p     | 1.079       | 0.994   | 0.973  | 0.912   | 0.103   | 0.873   | 0.588  | 0.017   |
| 153         | 0.903       | 1.011   | 1.069  | 1.042   | 0.025   | 0.837   | 0.040  | 0.205   |
| 181a        | 1.055       | 0.913   | 0.951  | 1.100   | 0.229   | 0.018   | 0.269  | 0.171   |

|         |       |       |       |       |       |       |       |       |
|---------|-------|-------|-------|-------|-------|-------|-------|-------|
| 181a*   | 0.899 | 0.984 | 0.950 | 0.953 | 0.016 | 0.785 | 0.131 | 0.254 |
| 181c    | 1.039 | 0.904 | 1.056 | 1.021 | 0.511 | 0.003 | 0.319 | 0.596 |
| 190b    | 0.896 | 0.976 | 1.017 | 0.984 | 0.006 | 0.636 | 0.551 | 0.793 |
| 192     | 0.903 | 0.992 | 1.088 | 0.945 | 0.011 | 0.850 | 0.080 | 0.401 |
| 193a-3p | 0.902 | 0.959 | 0.957 | 0.904 | 0.042 | 0.230 | 0.462 | 0.048 |
| 199b-5p | 0.931 | 0.901 | 0.947 | 0.938 | 0.045 | 0.015 | 0.294 | 0.119 |
| 200c    | 0.881 | 1.027 | 1.112 | 1.068 | 0.003 | 0.463 | 0.001 | 0.414 |
| 203     | 0.947 | 0.969 | 0.828 | 1.016 | 0.175 | 0.295 | 0.018 | 0.718 |
| 204     | 1.063 | 0.848 | 0.942 | 0.951 | 0.143 | 0.047 | 0.103 | 0.409 |
| 205     | 1.037 | 0.953 | 1.024 | 0.863 | 0.379 | 0.301 | 0.516 | 0.024 |
| 208b    | 0.882 | 0.920 | 0.924 | 0.875 | 0.010 | 0.002 | 0.207 | 0.003 |
| 214*    | 1.106 | 0.964 | 0.992 | 0.920 | 0.037 | 0.235 | 0.855 | 0.019 |
| 216a    | 0.906 | 0.913 | 0.949 | 0.975 | 0.121 | 0.014 | 0.205 | 0.562 |
| 218     | 0.914 | 1.100 | 0.917 | 1.048 | 0.013 | 0.122 | 0.032 | 0.179 |
| 219-5p  | 0.912 | 1.024 | 0.944 | 0.895 | 0.012 | 0.623 | 0.136 | 0.041 |
| 223     | 0.859 | 0.962 | 0.965 | 0.996 | 0.030 | 0.555 | 0.298 | 0.866 |
| 296-5p  | 0.916 | 0.969 | 0.966 | 0.748 | 0.034 | 0.301 | 0.310 | 0.004 |
| 302a    | 0.917 | 0.963 | 0.872 | 0.902 | 0.032 | 0.197 | 0.014 | 0.014 |
| 302c    | 0.994 | 0.893 | 1.053 | 0.978 | 0.875 | 0.047 | 0.216 | 0.315 |
| 335*    | 1.067 | 0.920 | 1.000 | 0.994 | 0.015 | 0.026 | 0.990 | 0.843 |
| 338-5p  | 0.953 | 0.906 | 0.954 | 1.061 | 0.134 | 0.018 | 0.136 | 0.152 |
| 361-5p  | 0.924 | 0.893 | 0.896 | 0.848 | 0.092 | 0.113 | 0.008 | 0.021 |
| 377     | 1.038 | 0.937 | 1.026 | 0.875 | 0.373 | 0.295 | 0.495 | 0.023 |
| 381     | 1.016 | 0.957 | 0.969 | 0.871 | 0.695 | 0.200 | 0.478 | 0.000 |
| 409-3p  | 1.014 | 0.909 | 0.916 | 1.052 | 0.674 | 0.044 | 0.041 | 0.089 |
| 409-5p  | 0.943 | 0.876 | 0.964 | 0.935 | 0.171 | 0.014 | 0.358 | 0.273 |
| 411-3p  | 0.885 | 0.988 | 1.045 | 0.939 | 0.036 | 0.770 | 0.616 | 0.333 |
| 448     | 0.959 | 0.883 | 1.008 | 1.071 | 0.404 | 0.031 | 0.835 | 0.194 |
| 450a    | 1.028 | 1.033 | 1.057 | 0.877 | 0.769 | 0.427 | 0.346 | 0.011 |
| 494     | 0.915 | 0.995 | 1.021 | 0.877 | 0.010 | 0.800 | 0.768 | 0.002 |
| 496     | 0.887 | 0.890 | 0.997 | 0.954 | 0.003 | 0.012 | 0.943 | 0.362 |
| 504     | 0.920 | 0.980 | 1.068 | 1.018 | 0.045 | 0.599 | 0.054 | 0.693 |
| 532-3p  | 0.986 | 0.856 | 0.955 | 0.914 | 0.673 | 0.003 | 0.159 | 0.123 |
| 551b    | 1.037 | 0.915 | 0.985 | 1.029 | 0.428 | 0.026 | 0.662 | 0.651 |
| 557     | 0.917 | 0.977 | 0.992 | 0.894 | 0.037 | 0.635 | 0.811 | 0.003 |
| 615-5p  | 0.982 | 0.976 | 0.883 | 0.916 | 0.746 | 0.293 | 0.049 | 0.025 |
| 652     | 1.089 | 0.887 | 0.983 | 1.127 | 0.005 | 0.009 | 0.709 | 0.010 |
| 663     | 0.905 | 0.945 | 0.940 | 1.011 | 0.036 | 0.213 | 0.033 | 0.778 |
| 671-3p  | 0.975 | 0.914 | 0.980 | 1.044 | 0.502 | 0.044 | 0.614 | 0.468 |
| 671-5p  | 0.894 | 1.053 | 0.906 | 0.855 | 0.011 | 0.424 | 0.174 | 0.006 |
| 708     | 1.003 | 0.890 | 1.068 | 0.909 | 0.927 | 0.030 | 0.056 | 0.031 |
| 708*    | 1.031 | 0.869 | 0.966 | 1.117 | 0.424 | 0.004 | 0.416 | 0.029 |
| 744     | 0.906 | 0.943 | 0.941 | 0.911 | 0.000 | 0.274 | 0.189 | 0.012 |
| 874     | 0.950 | 1.029 | 0.883 | 1.001 | 0.192 | 0.532 | 0.043 | 0.985 |

**Note:** Hits with cutoff of 0.92 and p-value  $<0.05$  were highlighted in red.

**Supplementary Table S6. miRNA hits targeting TGF $\beta$ 1 or TGF $\beta$ R1 in humans or mice**

| miRNAs    | Fold change     |                    |                    |                 |                  |
|-----------|-----------------|--------------------|--------------------|-----------------|------------------|
|           | H-TGF $\beta$ 1 | H-TGF $\beta$ R1-A | H-TGF $\beta$ R1-B | M-TGF $\beta$ 1 | M-TGF $\beta$ R1 |
| let7a     | 0.846           | 0.990              | 0.982              | 0.958           | 0.980            |
| let-7b-3p | 1.014           | 0.980              | 0.958              | 0.789           | 0.967            |
| let-7c    | 1.024           | 1.026              | 0.979              | 0.929           | 0.910            |
| let-7d    | 1.005           | 0.981              | 0.970              | 0.867           | 1.014            |
| let-7e    | 1.056           | 0.942              | 0.920              | 0.909           | 1.062            |
| let-7f    | 0.984           | 1.018              | 0.952              | 0.860           | 1.048            |
| let-7g    | 1.143           | 0.984              | 0.910              | 0.870           | 0.921            |
| let-7i    | 0.930           | 0.903              | 0.949              | 0.980           | 0.919            |
| 7         | 0.817           | 1.013              | 0.988              | 0.933           | 0.919            |
| 10a       | 0.865           | 0.959              | 0.983              | 0.979           | 1.051            |
| 15b       | 0.994           | 0.919              | 0.970              | 0.969           | 0.947            |
| 20b       | 0.932           | 0.964              | 0.941              | 0.895           | 0.928            |
| 24        | 1.092           | 1.033              | 1.027              | 0.913           | 0.982            |
| 26a       | 0.929           | 0.996              | 1.021              | 0.886           | 0.967            |
| 26b       | 0.963           | 1.002              | 1.044              | 0.855           | 1.012            |
| 26b*      | 0.866           | 0.972              | 0.980              | 1.023           | 0.983            |
| 27b       | 0.985           | 0.965              | 1.006              | 0.942           | 0.919            |
| 29c*      | 0.933           | 1.011              | 0.978              | 0.861           | 0.976            |
| 30a       | 0.869           | 0.964              | 0.991              | 1.091           | 1.029            |
| 30c       | 0.898           | 0.993              | 1.024              | 0.985           | 1.013            |
| 30c-2*    | 1.081           | 0.960              | 1.009              | 0.914           | 0.931            |
| 30e       | 1.002           | 0.963              | 1.085              | 0.880           | 1.094            |
| 92b       | 1.014           | 0.964              | 0.892              | 0.847           | 1.002            |
| 93        | 0.870           | 0.969              | 0.972              | 1.213           | 1.022            |
| 99a       | 0.939           | 0.944              | 0.969              | 0.878           | 0.961            |
| 103       | 1.011           | 1.056              | 0.988              | 0.816           | 1.006            |
| 107       | 1.023           | 1.009              | 0.905              | 0.808           | 1.059            |
| 124*      | 0.854           | 0.993              | 1.005              | 0.945           | 0.991            |
| 125a-5p   | 1.014           | 0.980              | 1.077              | 0.860           | 0.955            |
| 125b      | 1.008           | 0.973              | 1.000              | 0.988           | 0.905            |
| 126       | 0.902           | 0.910              | 0.963              | 0.977           | 0.993            |
| 127-5p    | 1.029           | 1.077              | 1.028              | 1.062           | 0.900            |
| 129*      | 0.908           | 0.961              | 1.033              | 1.002           | 0.944            |
| 129-3p    | 0.951           | 1.008              | 0.939              | 0.744           | 0.974            |
| 140-5p    | 0.920           | 0.984              | 0.955              | 0.934           | 0.927            |
| 145       | 0.860           | 1.014              | 0.998              | 0.823           | 1.065            |
| 151-5p    | 1.025           | 0.986              | 0.913              | 1.068           | 1.066            |
| 154*      | 0.957           | 1.017              | 1.058              | 0.857           | 0.996            |
| 181a*     | 0.772           | 0.909              | 0.893              | 0.906           | 0.917            |
| 181b      | 1.064           | 0.984              | 0.900              | 0.938           | 1.033            |

|         |       |       |       |       |       |
|---------|-------|-------|-------|-------|-------|
| 185     | 1.148 | 0.971 | 0.876 | 1.019 | 0.960 |
| 191     | 0.962 | 1.004 | 0.997 | 0.881 | 0.987 |
| 193a-3p | 1.021 | 0.873 | 1.092 | 0.828 | 1.029 |
| 195     | 1.050 | 0.985 | 1.032 | 0.909 | 1.004 |
| 196a    | 0.886 | 0.944 | 1.010 | 1.182 | 1.026 |
| 196b    | 0.862 | 1.018 | 0.996 | 1.035 | 1.004 |
| 200b    | 0.866 | 1.024 | 0.959 | 0.976 | 1.036 |
| 208b    | 0.996 | 0.944 | 1.017 | 0.909 | 1.039 |
| 216a    | 1.007 | 0.876 | 1.060 | 0.892 | 1.049 |
| 218     | 0.979 | 0.989 | 1.035 | 0.829 | 0.963 |
| 221     | 1.076 | 0.956 | 0.878 | 1.008 | 0.983 |
| 296-3p  | 1.100 | 0.989 | 1.038 | 0.887 | 0.957 |
| 301a    | 1.063 | 0.905 | 0.930 | 1.024 | 0.984 |
| 302a    | 1.017 | 1.022 | 0.948 | 0.994 | 0.837 |
| 323-3p  | 0.925 | 1.046 | 1.034 | 0.831 | 0.986 |
| 324-5P  | 1.036 | 0.893 | 0.989 | 0.988 | 1.019 |
| 331-3p  | 0.997 | 0.918 | 0.985 | 0.847 | 1.085 |
| 335     | 1.005 | 0.905 | 1.003 | 0.945 | 0.973 |
| 335*    | 0.976 | 0.883 | 0.946 | 0.955 | 1.038 |
| 338-5p  | 0.936 | 1.075 | 0.916 | 0.892 | 1.007 |
| 342-3P  | 1.023 | 0.890 | 0.922 | 0.966 | 0.943 |
| 365     | 0.880 | 0.956 | 0.934 | 0.982 | 1.058 |
| 369-3p  | 0.877 | 0.985 | 1.004 | 0.948 | 1.046 |
| 374b    | 1.002 | 0.966 | 1.087 | 0.841 | 0.953 |
| 377     | 0.955 | 0.935 | 1.004 | 0.850 | 0.979 |
| 378b    | 1.035 | 0.914 | 1.082 | 1.071 | 1.052 |
| 381     | 0.873 | 1.001 | 0.927 | 0.931 | 0.987 |
| 382     | 0.950 | 1.005 | 1.002 | 0.895 | 1.029 |
| 410     | 1.044 | 1.002 | 1.008 | 0.880 | 0.910 |
| 411-3p  | 0.972 | 0.891 | 1.059 | 0.790 | 0.999 |
| 421     | 0.859 | 0.990 | 0.985 | 0.916 | 0.880 |
| 448     | 1.034 | 0.922 | 0.922 | 0.756 | 1.125 |
| 487a    | 1.067 | 0.905 | 1.031 | 1.084 | 0.986 |
| 490-3p  | 0.972 | 0.999 | 1.086 | 0.822 | 0.994 |
| 495     | 0.933 | 0.951 | 0.969 | 0.831 | 1.000 |
| 496     | 0.900 | 0.970 | 1.018 | 0.808 | 0.926 |
| 499-5p  | 0.911 | 1.016 | 1.004 | 1.008 | 0.997 |
| 532-5p  | 0.980 | 0.962 | 1.061 | 0.848 | 0.986 |
| 543     | 1.090 | 1.008 | 1.015 | 0.909 | 0.910 |
| 568     | 0.834 | 1.003 | 0.996 | 1.085 | 0.957 |
| 574-3p  | 0.873 | 0.970 | 1.035 | 0.971 | 1.061 |
| 663     | 0.904 | 0.948 | 0.969 | 0.888 | 0.972 |
| 708     | 1.115 | 0.962 | 0.979 | 1.222 | 0.920 |

|        |       |       |       |       |       |
|--------|-------|-------|-------|-------|-------|
| 708    | 1.069 | 1.021 | 1.069 | 1.047 | 0.906 |
| 708*   | 0.843 | 0.953 | 1.008 | 0.771 | 0.975 |
| 711    | 1.060 | 1.034 | 0.980 | 0.955 | 0.878 |
| 761    | 0.939 | 0.919 | 1.026 | 0.868 | 1.086 |
| 875-5p | 0.830 | 0.997 | 0.992 | 1.064 | 0.956 |

| miRNAs    | P value |            |            |         |          |
|-----------|---------|------------|------------|---------|----------|
|           | H-TGFβ1 | H-TGFβR1-A | H-TGFβR1-B | M-TGFβ1 | M-TGFβR1 |
| let7a     | 0.000   | 0.622      | 0.594      | 0.352   | 0.815    |
| let-7b-3p | 0.728   | 0.323      | 0.292      | 0.001   | 0.411    |
| let-7c    | 0.645   | 0.408      | 0.456      | 0.095   | 0.002    |
| let-7d    | 0.915   | 0.336      | 0.430      | 0.000   | 0.601    |
| let-7e    | 0.036   | 0.005      | 0.007      | 0.017   | 0.192    |
| let-7f    | 0.639   | 0.445      | 0.241      | 0.028   | 0.375    |
| let-7g    | 0.010   | 0.534      | 0.008      | 0.030   | 0.009    |
| let-7i    | 0.153   | 0.004      | 0.150      | 0.404   | 0.041    |
| 7         | 0.001   | 0.502      | 0.748      | 0.123   | 0.010    |
| 10a       | 0.003   | 0.106      | 0.597      | 0.667   | 0.088    |
| 15b       | 0.915   | 0.001      | 0.315      | 0.343   | 0.171    |
| 20b       | 0.058   | 0.232      | 0.027      | 0.021   | 0.029    |
| 24        | 0.140   | 0.065      | 0.444      | 0.011   | 0.519    |
| 26a       | 0.057   | 0.775      | 0.535      | 0.004   | 0.094    |
| 26b       | 0.378   | 0.914      | 0.061      | 0.000   | 0.697    |
| 26b*      | 0.049   | 0.188      | 0.475      | 0.696   | 0.634    |
| 27b       | 0.705   | 0.057      | 0.863      | 0.283   | 0.007    |
| 29c*      | 0.099   | 0.542      | 0.396      | 0.002   | 0.218    |
| 30a       | 0.047   | 0.119      | 0.605      | 0.063   | 0.190    |
| 30c       | 0.048   | 0.809      | 0.463      | 0.774   | 0.556    |
| 30c-2*    | 0.205   | 0.214      | 0.631      | 0.031   | 0.001    |
| 30e       | 0.959   | 0.107      | 0.032      | 0.012   | 0.026    |
| 92b       | 0.772   | 0.231      | 0.001      | 0.049   | 0.944    |
| 93        | 0.019   | 0.048      | 0.251      | 0.000   | 0.271    |
| 99a       | 0.141   | 0.022      | 0.274      | 0.037   | 0.028    |
| 103       | 0.849   | 0.016      | 0.724      | 0.005   | 0.751    |
| 107       | 0.565   | 0.751      | 0.002      | 0.009   | 0.079    |
| 124*      | 0.006   | 0.766      | 0.846      | 0.111   | 0.840    |
| 125a-5p   | 0.795   | 0.435      | 0.040      | 0.043   | 0.070    |
| 125b      | 0.844   | 0.161      | 0.998      | 0.800   | 0.016    |
| 126       | 0.126   | 0.000      | 0.139      | 0.704   | 0.001    |
| 127-5p    | 0.594   | 0.012      | 0.107      | 0.237   | 0.000    |
| 129*      | 0.007   | 0.158      | 0.151      | 0.959   | 0.137    |
| 129-3p    | 0.033   | 0.685      | 0.017      | 0.000   | 0.268    |
| 140-5p    | 0.045   | 0.596      | 0.108      | 0.355   | 0.030    |

---

|         |       |       |       |       |       |
|---------|-------|-------|-------|-------|-------|
| 145     | 0.000 | 0.395 | 0.941 | 0.000 | 0.001 |
| 151-5p  | 0.652 | 0.400 | 0.014 | 0.479 | 0.006 |
| 154*    | 0.303 | 0.619 | 0.096 | 0.026 | 0.851 |
| 181a*   | 0.000 | 0.013 | 0.001 | 0.040 | 0.015 |
| 181b    | 0.033 | 0.427 | 0.006 | 0.367 | 0.497 |
| 185     | 0.039 | 0.141 | 0.002 | 0.720 | 0.057 |
| 191     | 0.295 | 0.891 | 0.933 | 0.014 | 0.611 |
| 193a-3p | 0.627 | 0.000 | 0.003 | 0.017 | 0.460 |
| 195     | 0.251 | 0.349 | 0.280 | 0.034 | 0.867 |
| 196a    | 0.000 | 0.028 | 0.676 | 0.001 | 0.421 |
| 196b    | 0.015 | 0.207 | 0.848 | 0.671 | 0.782 |
| 200b    | 0.001 | 0.274 | 0.162 | 0.608 | 0.075 |
| 208b    | 0.920 | 0.017 | 0.587 | 0.029 | 0.266 |
| 216a    | 0.845 | 0.001 | 0.034 | 0.036 | 0.079 |
| 218     | 0.723 | 0.594 | 0.066 | 0.000 | 0.123 |
| 221     | 0.120 | 0.085 | 0.009 | 0.837 | 0.427 |
| 296-3p  | 0.056 | 0.498 | 0.341 | 0.039 | 0.010 |
| 301a    | 0.061 | 0.000 | 0.014 | 0.597 | 0.384 |
| 302a    | 0.669 | 0.416 | 0.145 | 0.914 | 0.000 |
| 323-3p  | 0.040 | 0.006 | 0.341 | 0.005 | 0.348 |
| 324-5P  | 0.459 | 0.005 | 0.750 | 0.786 | 0.542 |
| 331-3p  | 0.929 | 0.010 | 0.616 | 0.010 | 0.015 |
| 335     | 0.933 | 0.009 | 0.925 | 0.297 | 0.420 |
| 335*    | 0.706 | 0.001 | 0.207 | 0.409 | 0.262 |
| 338-5p  | 0.110 | 0.179 | 0.047 | 0.022 | 0.725 |
| 342-3P  | 0.558 | 0.002 | 0.020 | 0.407 | 0.014 |
| 365     | 0.001 | 0.044 | 0.132 | 0.776 | 0.222 |
| 369-3p  | 0.046 | 0.509 | 0.863 | 0.309 | 0.052 |
| 374b    | 0.986 | 0.125 | 0.020 | 0.011 | 0.040 |
| 377     | 0.195 | 0.027 | 0.903 | 0.001 | 0.516 |
| 378b    | 0.227 | 0.000 | 0.041 | 0.058 | 0.004 |
| 381     | 0.002 | 0.970 | 0.052 | 0.041 | 0.522 |
| 382     | 0.179 | 0.842 | 0.936 | 0.031 | 0.544 |
| 410     | 0.330 | 0.898 | 0.793 | 0.014 | 0.041 |
| 411-3p  | 0.464 | 0.000 | 0.059 | 0.002 | 0.976 |
| 421     | 0.002 | 0.674 | 0.682 | 0.053 | 0.012 |
| 448     | 0.393 | 0.005 | 0.020 | 0.000 | 0.009 |
| 487a    | 0.148 | 0.000 | 0.379 | 0.059 | 0.520 |
| 490-3p  | 0.502 | 0.982 | 0.012 | 0.002 | 0.761 |
| 495     | 0.082 | 0.050 | 0.271 | 0.003 | 0.984 |
| 496     | 0.039 | 0.312 | 0.463 | 0.000 | 0.000 |
| 499-5p  | 0.037 | 0.319 | 0.920 | 0.785 | 0.873 |
| 532-5p  | 0.706 | 0.106 | 0.053 | 0.009 | 0.333 |
| 543     | 0.069 | 0.472 | 0.616 | 0.032 | 0.008 |

---



---

|        |       |       |       |       |       |
|--------|-------|-------|-------|-------|-------|
| 568    | 0.012 | 0.869 | 0.883 | 0.102 | 0.273 |
| 574-3p | 0.004 | 0.229 | 0.169 | 0.576 | 0.010 |
| 663    | 0.041 | 0.083 | 0.201 | 0.026 | 0.197 |
| 708    | 0.034 | 0.116 | 0.706 | 0.005 | 0.025 |
| 708    | 0.117 | 0.133 | 0.011 | 0.121 | 0.049 |
| 708*   | 0.001 | 0.071 | 0.798 | 0.000 | 0.126 |
| 711    | 0.125 | 0.320 | 0.358 | 0.532 | 0.000 |
| 761    | 0.264 | 0.003 | 0.448 | 0.017 | 0.039 |
| 875-5p | 0.001 | 0.841 | 0.733 | 0.532 | 0.081 |

---

**Note:** Hits with cutoff of 0.92 and p-value <0.05 were highlighted in red.

**Supplementary Table S7. Primer list of genes to be cloned**

| Description 1                          | 5'-3' Sequence                    |
|----------------------------------------|-----------------------------------|
| Human <i>TGFβ1</i> 5'UTR               | GGGCCATCTCCCTCCCAC                |
|                                        | ACTGCCGAGAGCGCGAAC                |
| Human <i>TGFβR1</i> 3'UTR<br>1-2600    | TTCTACAGCTTTGCCTGAACTC            |
|                                        | GAAGATGTTTTAGCCACGTTGA            |
| Human <i>TGFβR1</i> 3'UTR<br>2500-4600 | GGATGGATCATGATTACTGTCTG           |
|                                        | GTTCTCTTGTAAGCCAAGTTTTTCAC        |
| Human <i>TGFβ1</i> coding region*      | CGCAGTCACCGTCCTGACACG             |
|                                        | CGGCGATCCTCTGGAGATTG              |
| Monkey <i>TGFβ1</i> 5'UTR              | GGCCCCAGAGTCTGAGACGA              |
|                                        | TGCCGAGAGGGCGAACAG                |
| Monkey <i>TGFβR1</i> 3'UTR             | CCCAGGAAACAGCCGTGT                |
|                                        | CAAGATTGCATAACGGGATTGA            |
| Mouse <i>TGFβ1</i> 5'UTR               | GGATCCTCCAGACAGCCAGG              |
|                                        | CACTTCGGAGAGCGGGAAC               |
| Mouse <i>TGFβR1</i> 3'UTR              | CTGAAACACCGTGGGAACTCTGCTCTCTTC    |
|                                        | CGCGATGATGTCATTTGGGGTACAGATATAAAC |
| Rat <i>TGFβR1</i> 3'UTR                | TACTTCTTCCCAGACAGTTACAGA          |
|                                        | CTGCACTCATTCCCAGACTAC             |
| Human <i>FGF1</i> 3'UTR                | CTCCCCAGACTCCACCGTC               |
|                                        | ATGCCCTGGGAGAAGATACAG             |
| Mouse <i>FGF1</i> 3'UTR                | CTTGACCATTGGCTGCGCTAA             |
|                                        | CCCGGATGGTGACTAGGTTGA             |
| Human <i>FGFR1</i> 3'UTR               | CTCCCCAGACTCCACCGTC               |
|                                        | AAGACACTCCTGTGCGGTCTC             |
| Mouse <i>FGFR1</i> 3'UTR               | TCTCCATTCCGTCGTCAC                |
|                                        | TGCATTTAAAGAAGCAGCCCT             |
| Human <i>HGF</i> 3'UTR                 | CCCCTATGTGTAGAACTGTAAC            |
|                                        | TAGGGAACAGAATATGATATG             |
| Mouse <i>HGF</i> 3'UTR                 | CCAGTGTGTTTGAAGCATCCA             |
|                                        | CTGGAAAGCAGCATAGAGTGA             |
| Human <i>HGFR</i> 3'UTR                | GCCAAAATTGCACTATTATAGG            |
|                                        | TTCTTTCTATTGATGCGTTCAT            |
| Mouse <i>HGFR</i> 3'UTR                | CCCAAACCAGACTATCCC                |
|                                        | TGCCCTAGGAAGAGTCATAA              |

**Note:**

1. Other 5'UTRs or 3'UTRs from *TGFβ1* or *TGFβR1* not described above were synthesized according to the sequences published in GenBank.

\*: Cloned from TGF $\beta$ 1 plasmid purchased from Sino Biological Inc.
